# Supplementary material for: Stereoselective synthesis of short benzyl malonyl peptides
Source: Royal Society of Chemistry journal article supplement (doi:10.1039/c3ra41852a), 2013-01-01

## **Stereoselective synthesis of short benzyl malonyl peptides**

Emanuele Aresu, Stefania Fioravanti,\* Simona Gasbarri, Lucio Pellacani,  
and Fabio Sciubba

*Dipartimento di Chimica, Università di Roma La Sapienza, P.le Aldo Moro 5, I-00185 Roma, Italy*

*E-mail: stefania.fioravanti@uniroma1.it*

### Di-*tert*-butyl 2,2'-[(2-methylmalonyl)bis(azanediy)]diacetate (2a)

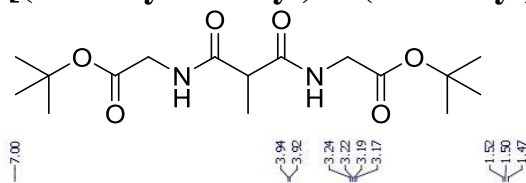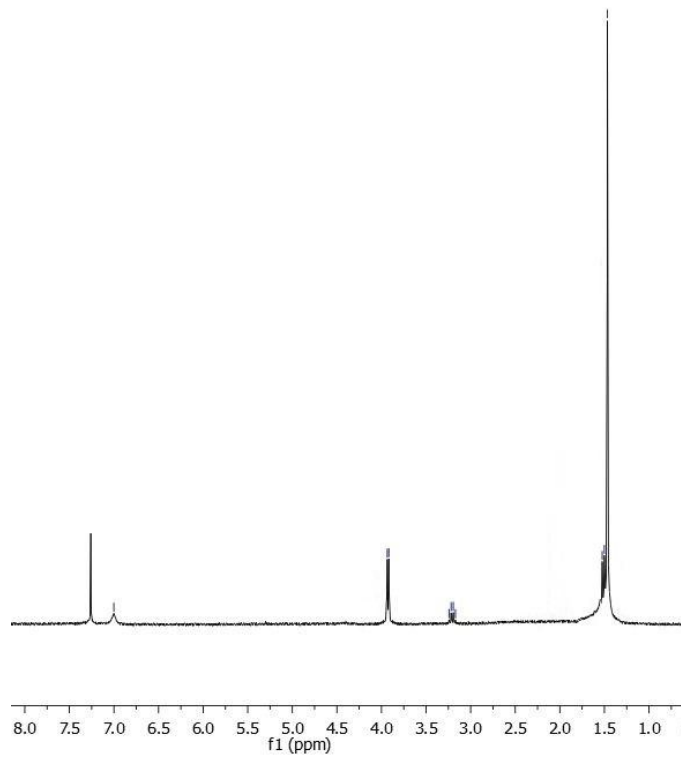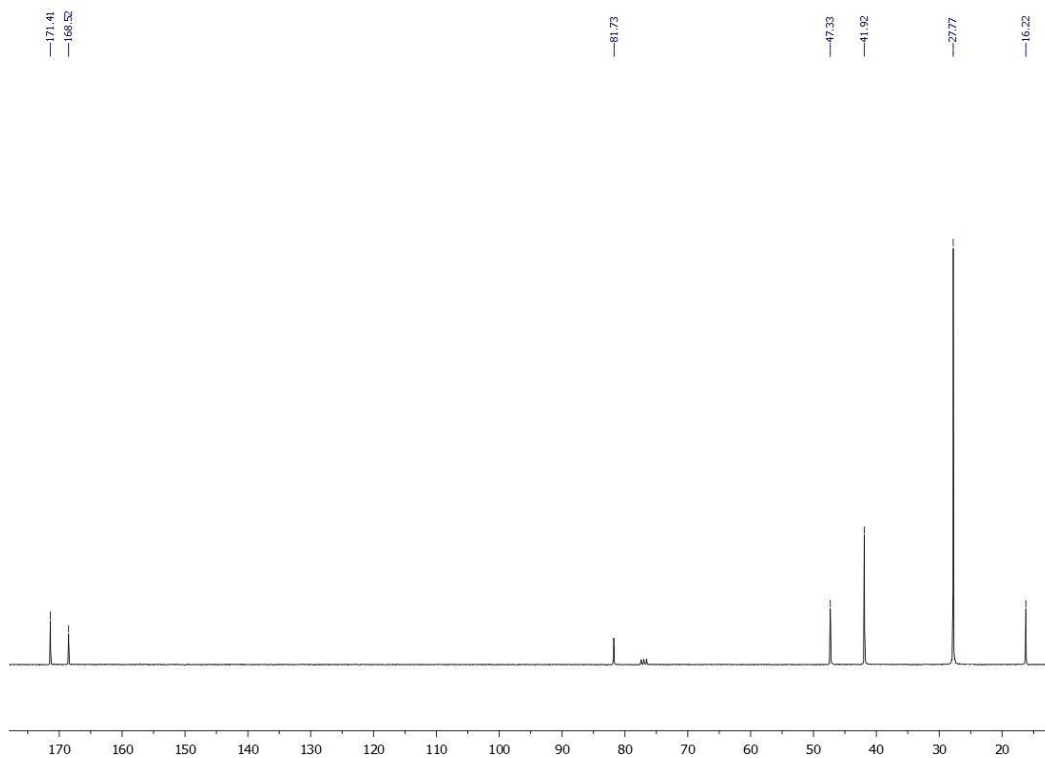

Supplementary Material (ESI) for RSC Advances

### Methyl 3-{3-[(2-*tert*-butoxy-2-oxoethyl)amino]-2-methyl-3-oxopropanamido}propanoate (2b)

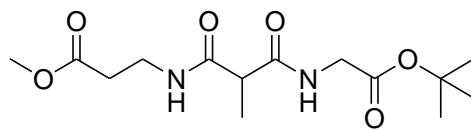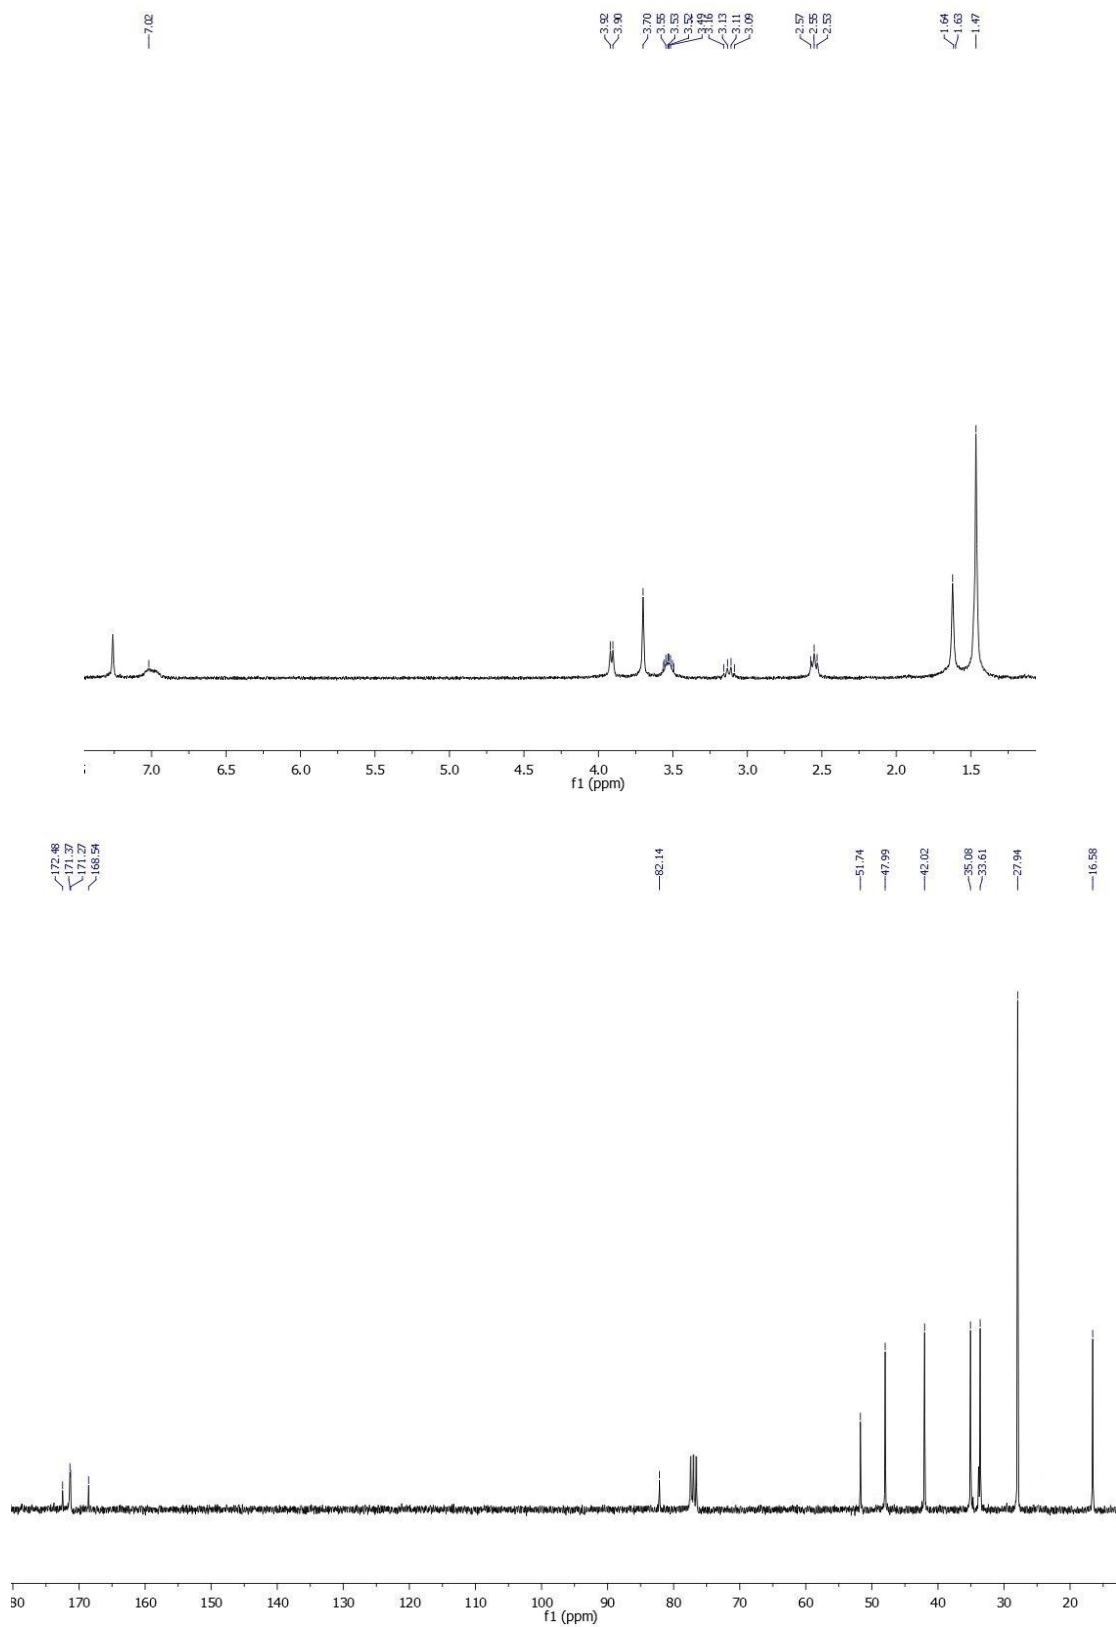

Supplementary Material (ESI) for RSC Advances

### Methyl (2S)-2-[3-(2-methoxy-2-oxoethylamino)-2-methyl-3-oxopropanamido]-4-methylpentanoate (2c)

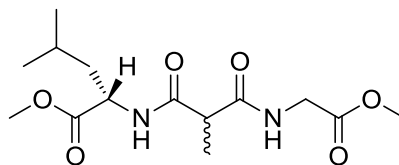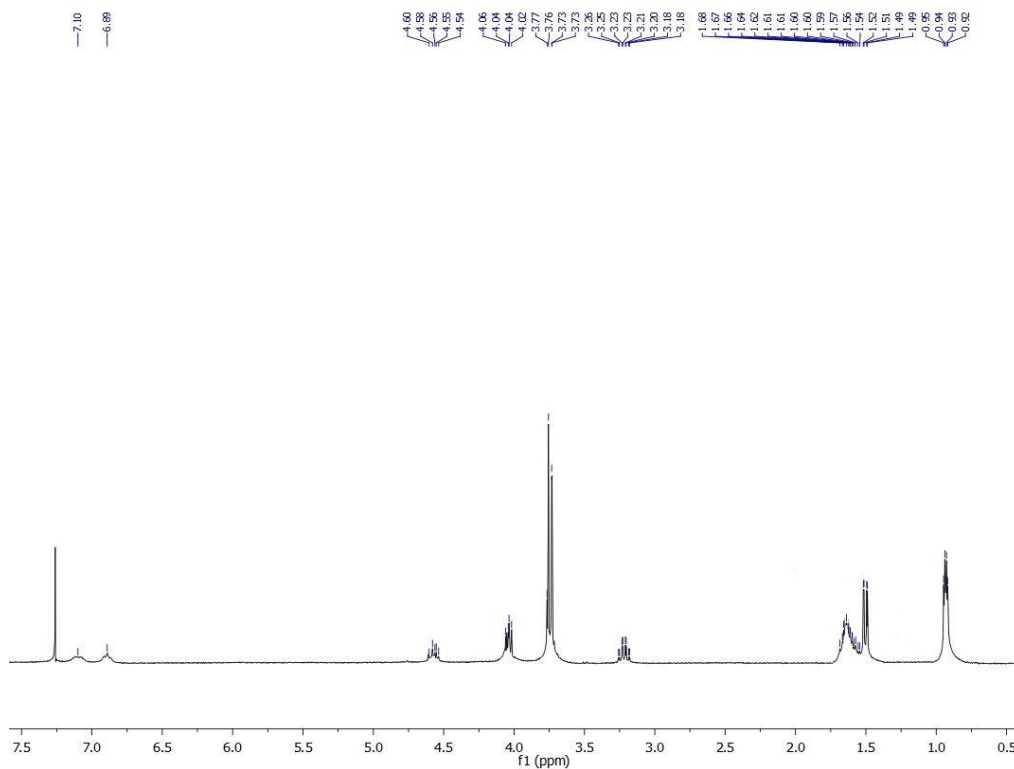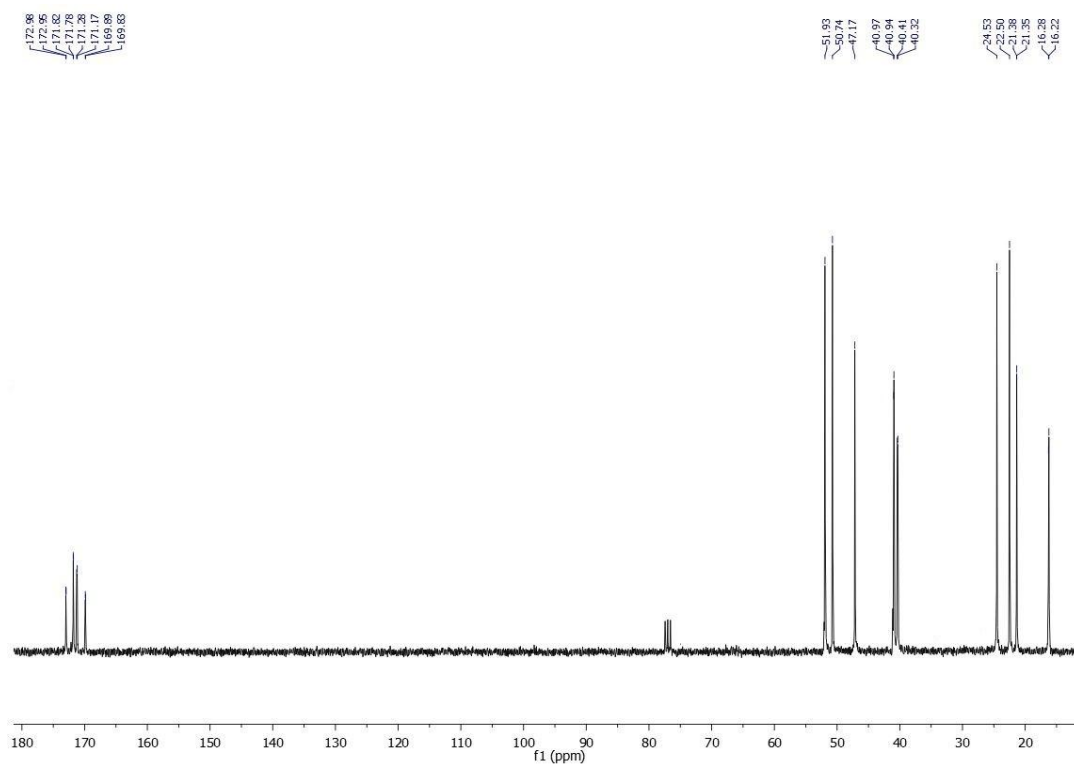

Supplementary Material (ESI) for RSC Advances

***tert*-Butyl (2*S*)-2-{3-[(2-*tert*-butoxy-2-oxoethyl)amino]-2-methyl-3-oxopropanamido}-3-phenylpropanoate (2d)**

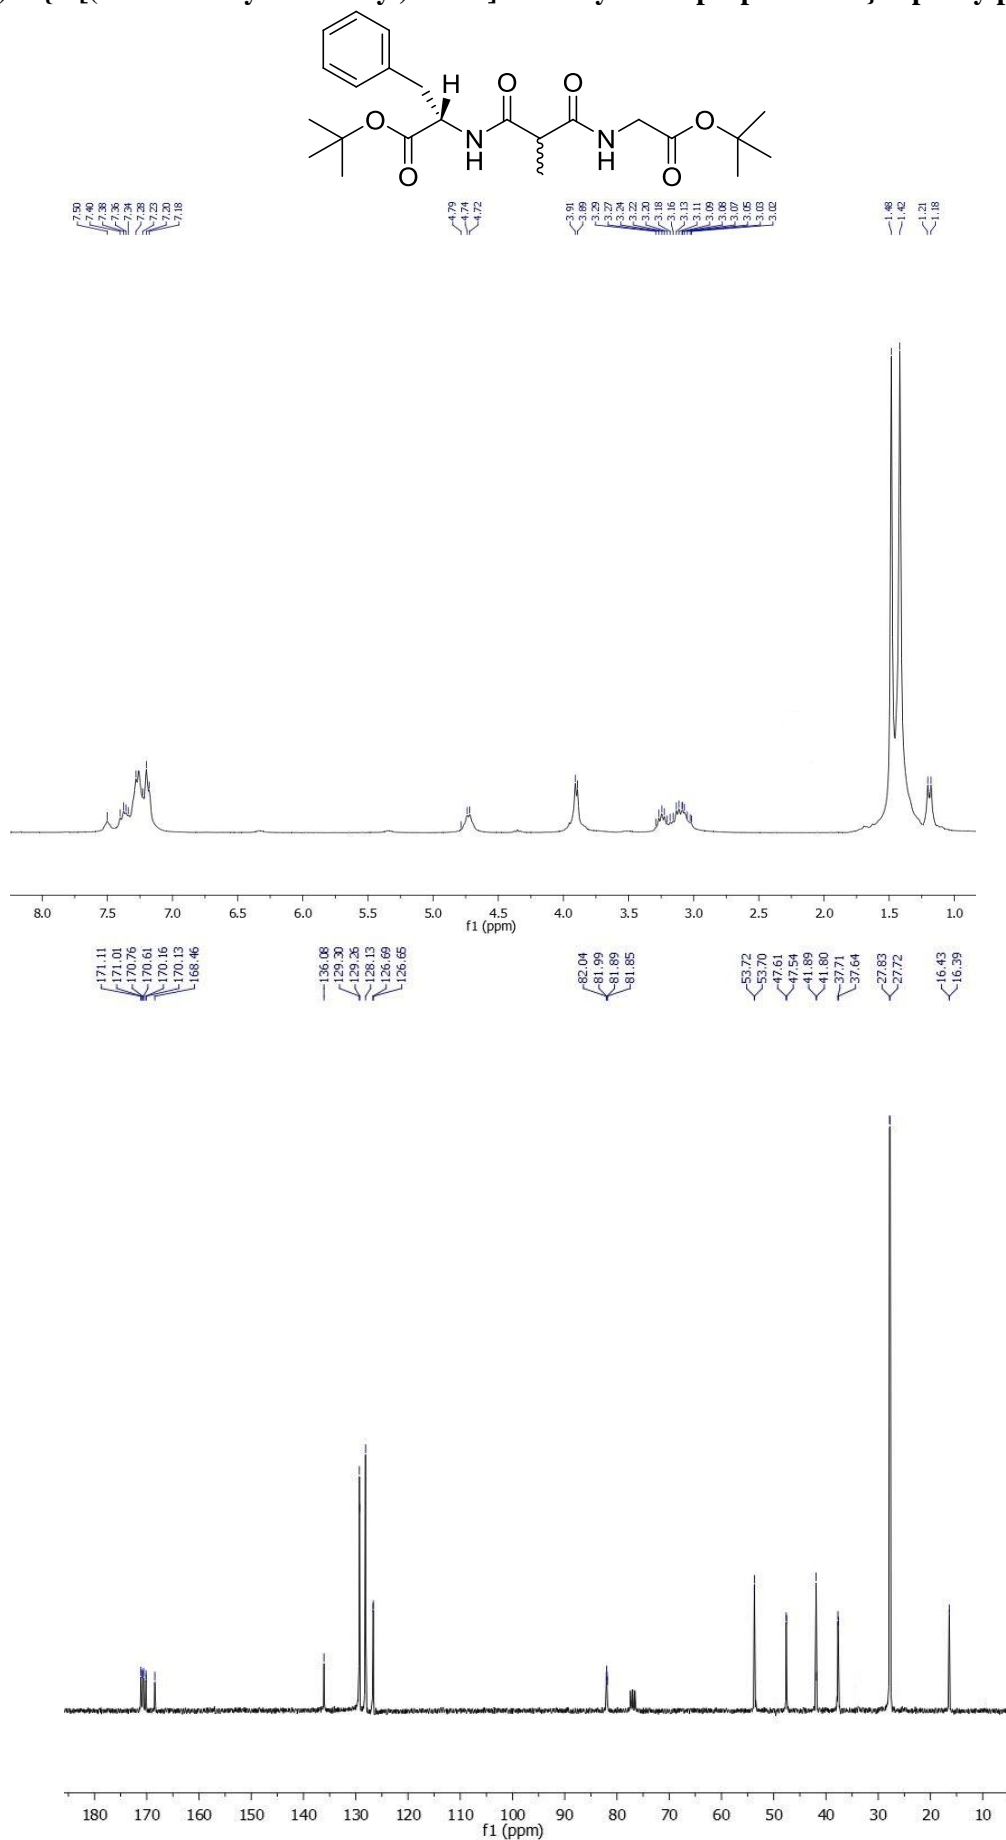

Supplementary Material (ESI) for RSC Advances

### Methyl (2S)-2-{3-[(3-methoxy-3-oxopropyl)amino]-2-methyl-3-oxopropanamido}-3-phenylpropanoate (2e)

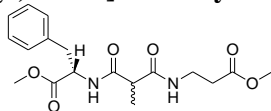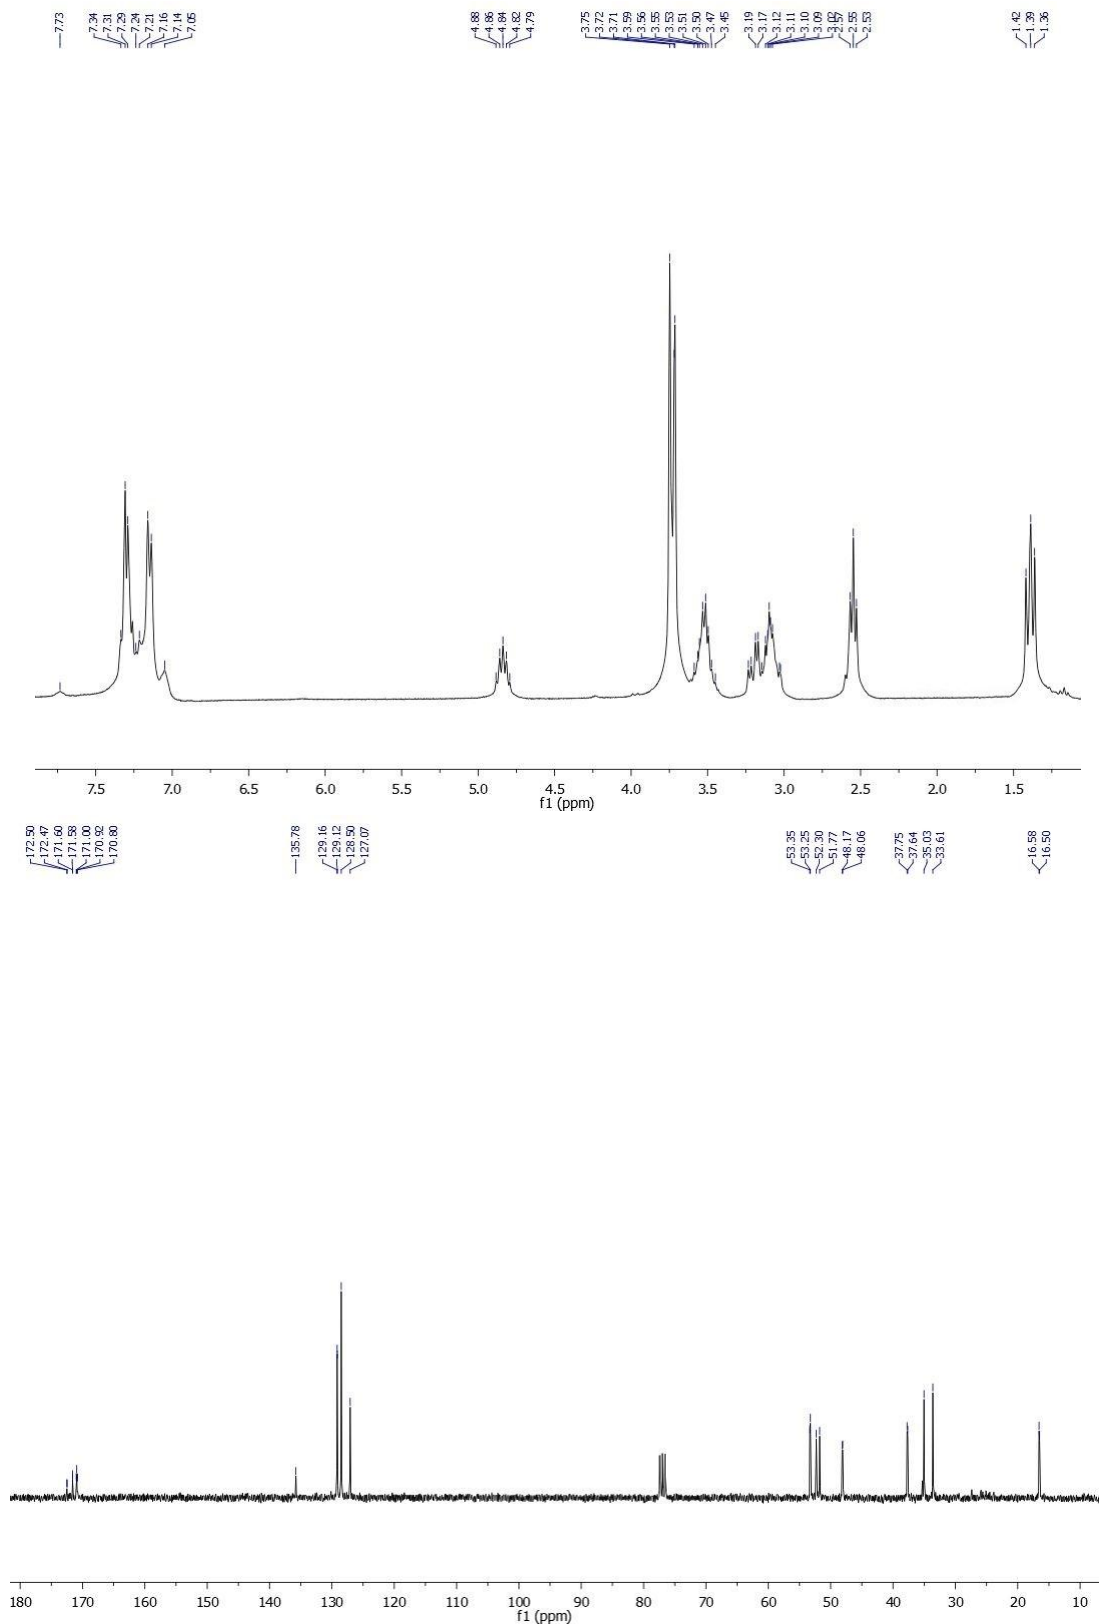

Supplementary Material (ESI) for RSC Advances

### Methyl (2*S*)-2-(3-(2-methoxy-2-oxoethylamino)-2-methyl-3-oxopropanamido)-3-phenylpropanoate (2f)

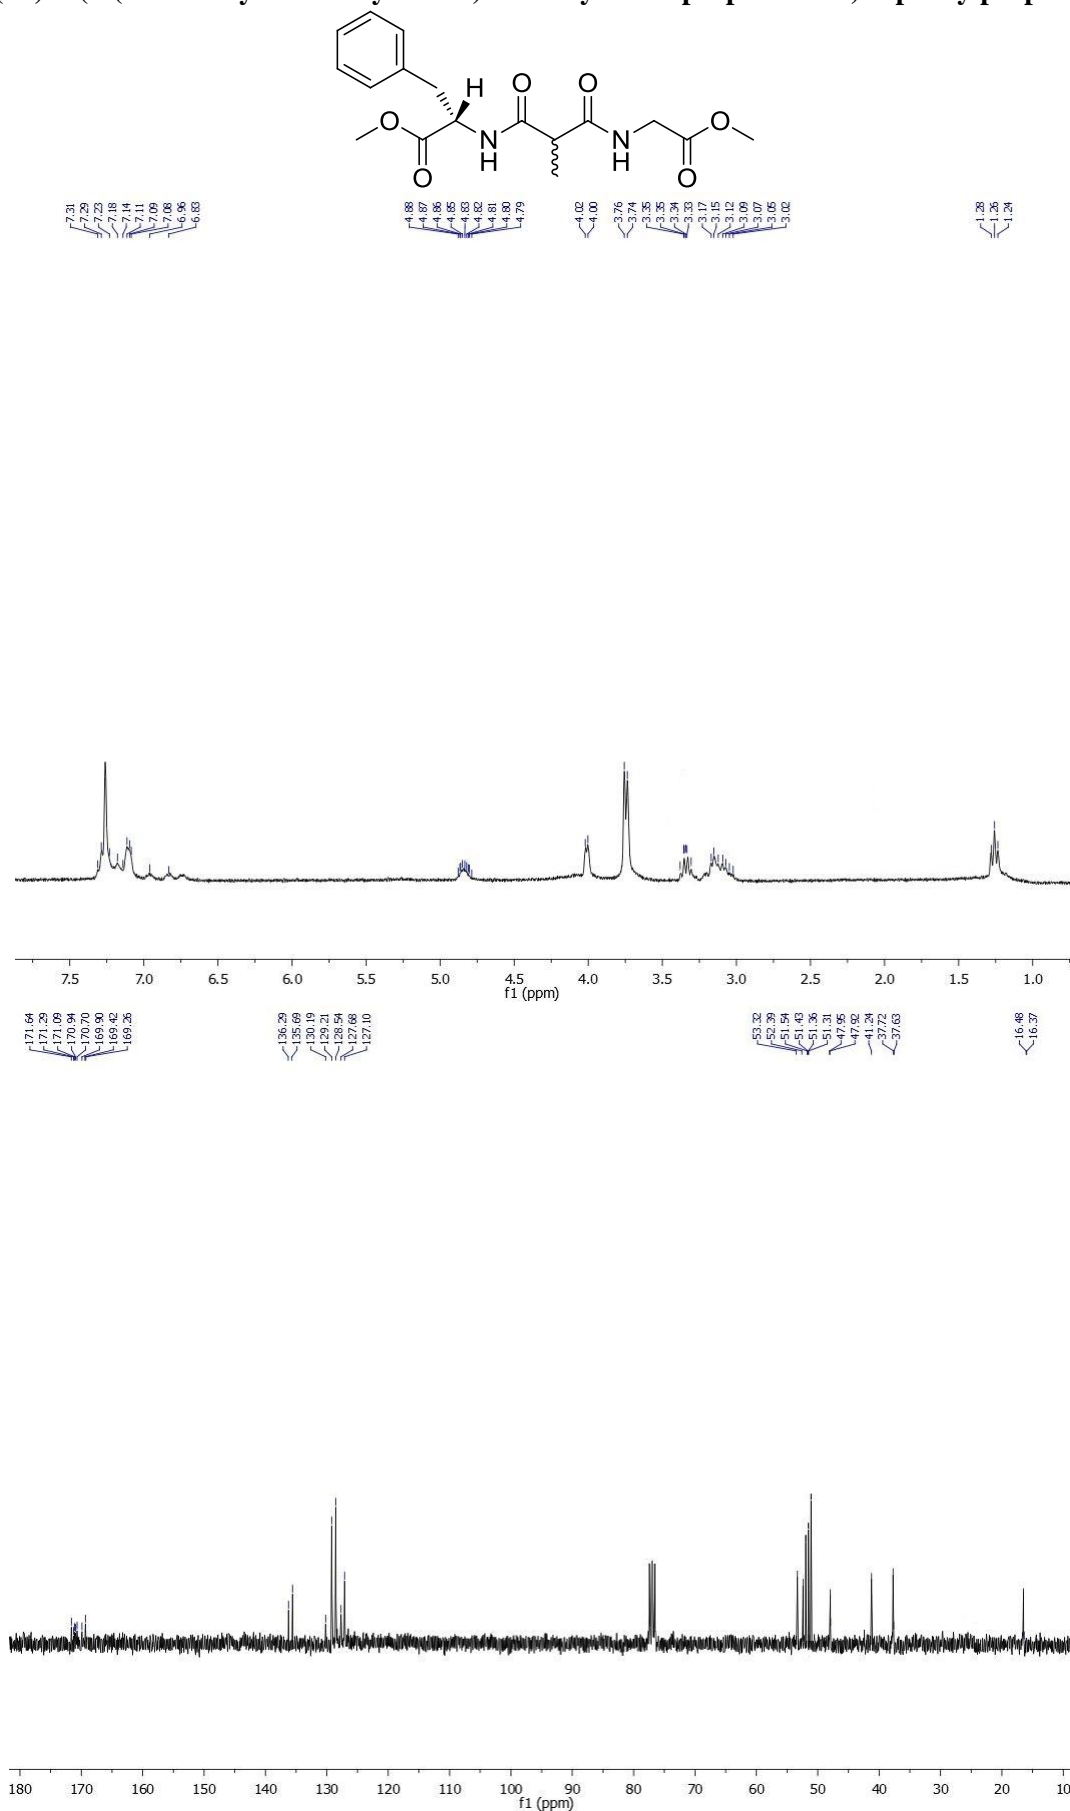

Supplementary Material (ESI) for RSC Advances

**Di-*tert*-butyl 2,2'-[(2-methylenemalonyl)bis(azanediyl)]diacetate (3a)**

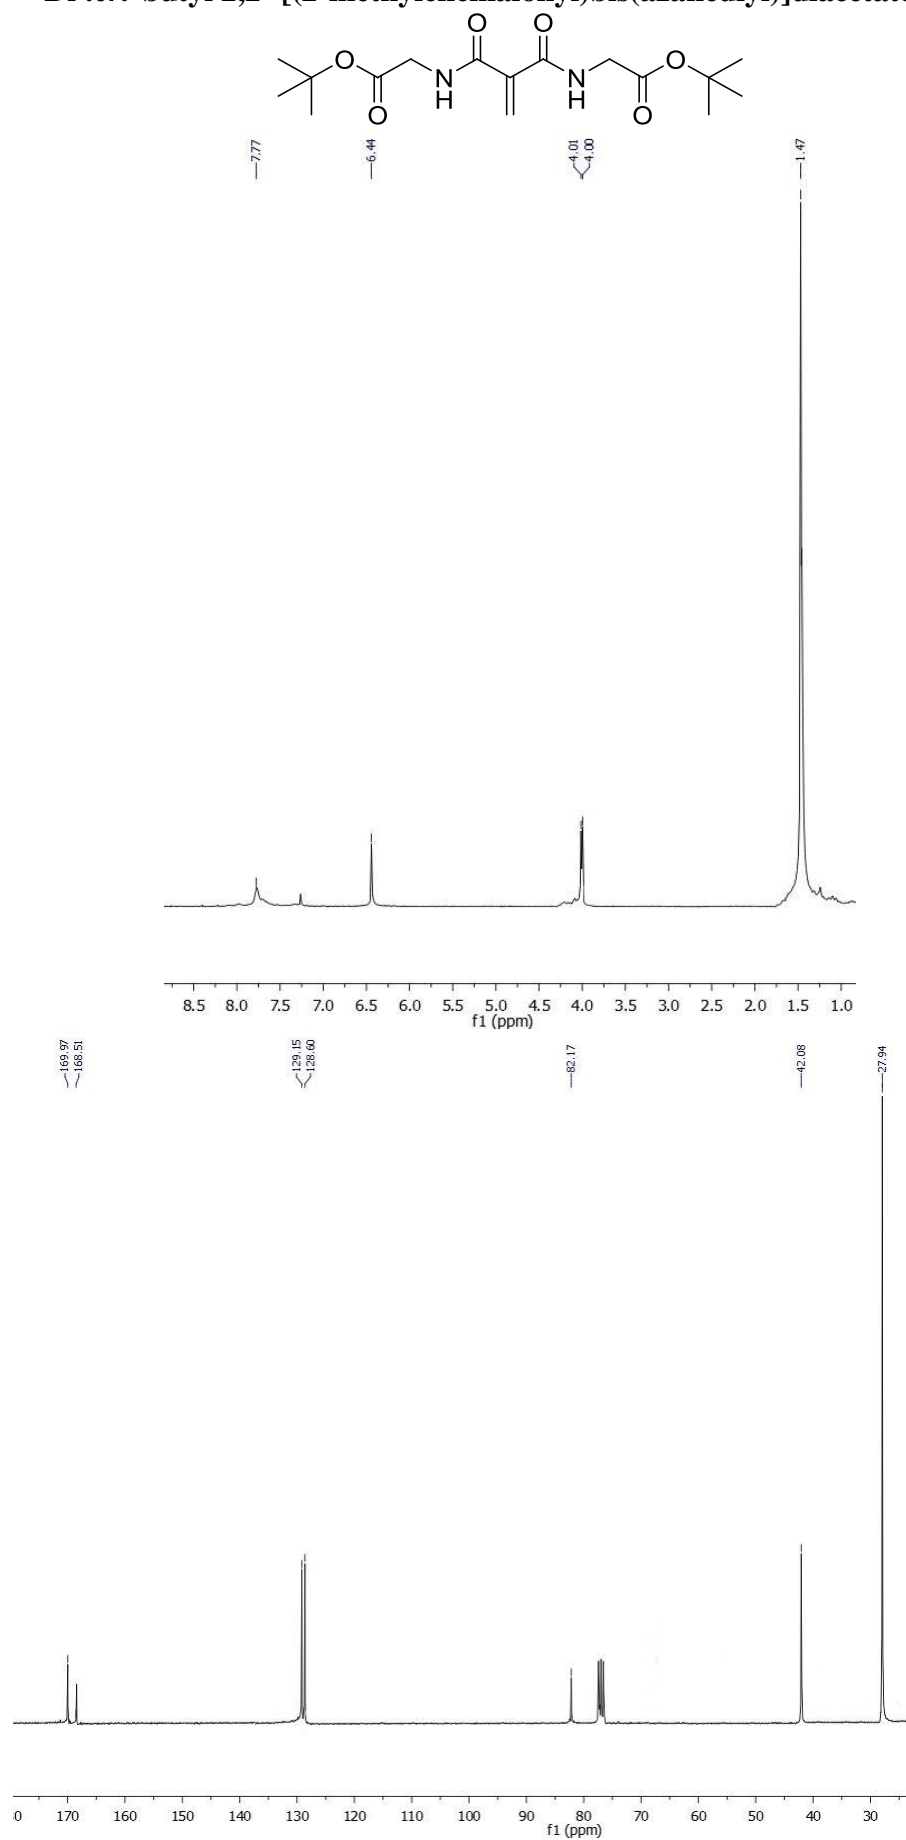



Supplementary Material (ESI) for RSC Advances

### Methyl 3-[2-(2-*tert*-butoxy-2-oxoethylcarbamoyl)acrylamido]propanoate (3b)

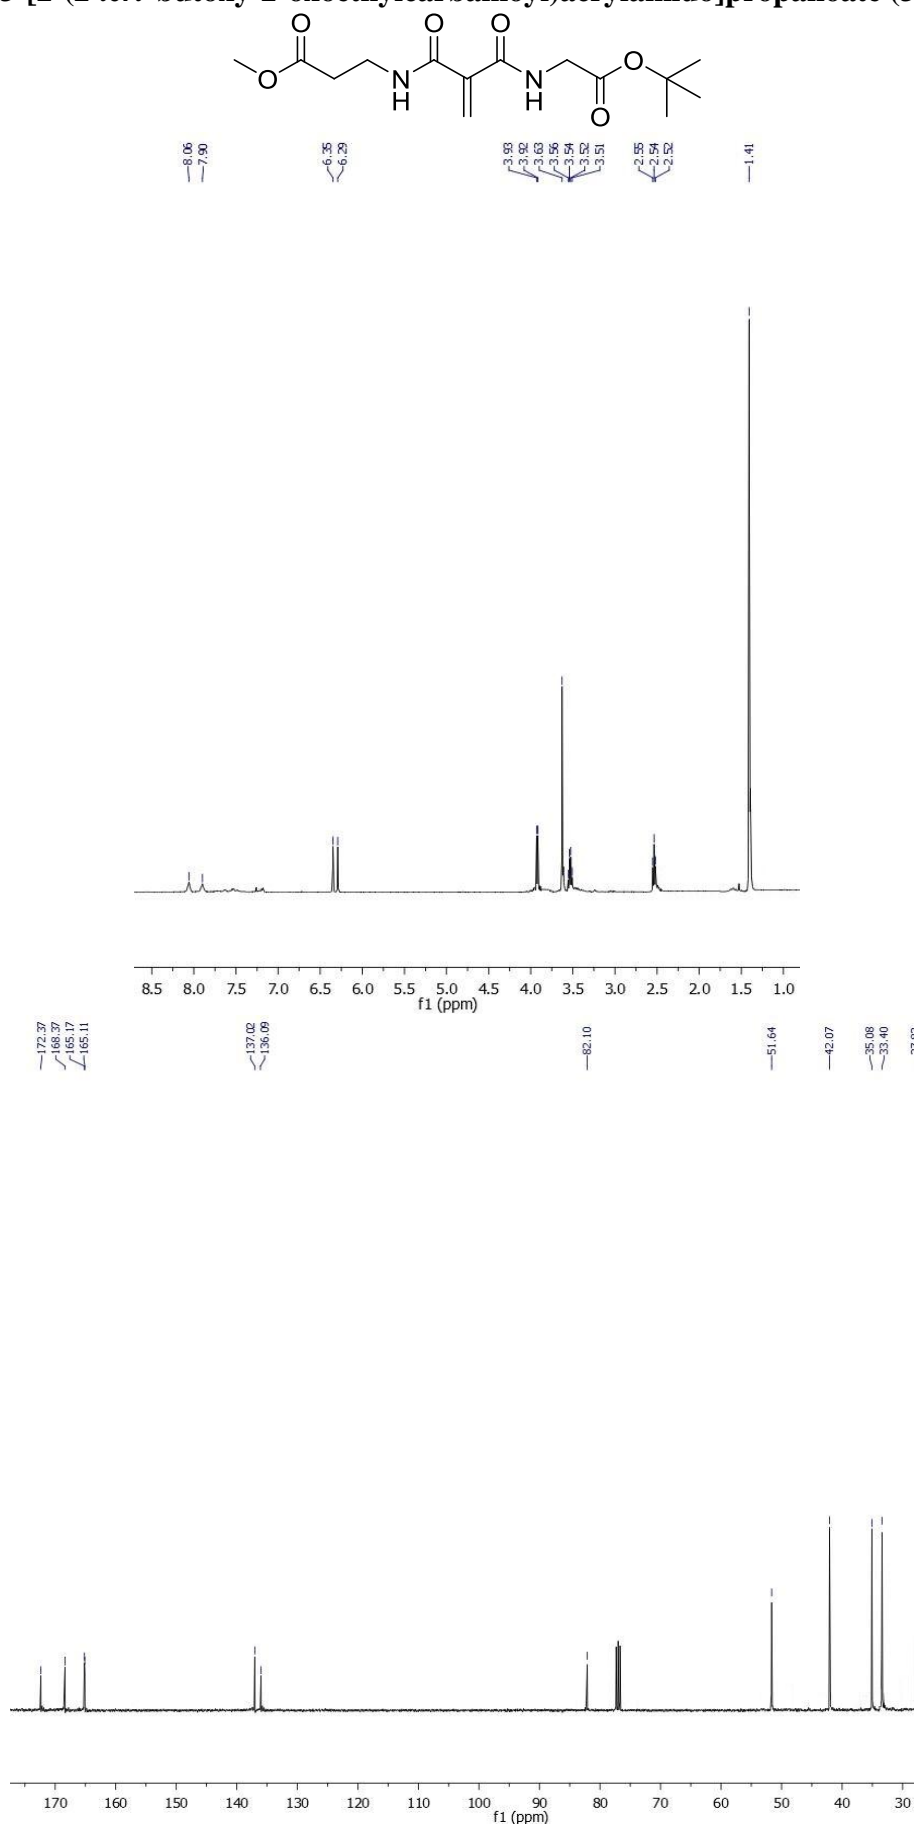

Supplementary Material (ESI) for RSC Advances

**Methyl (2*S*)-2-[(2-[(2-methoxy-2-oxoethyl)amino]carbonyl)acryloyl]amino]-4-methylpentanoate (3c)**

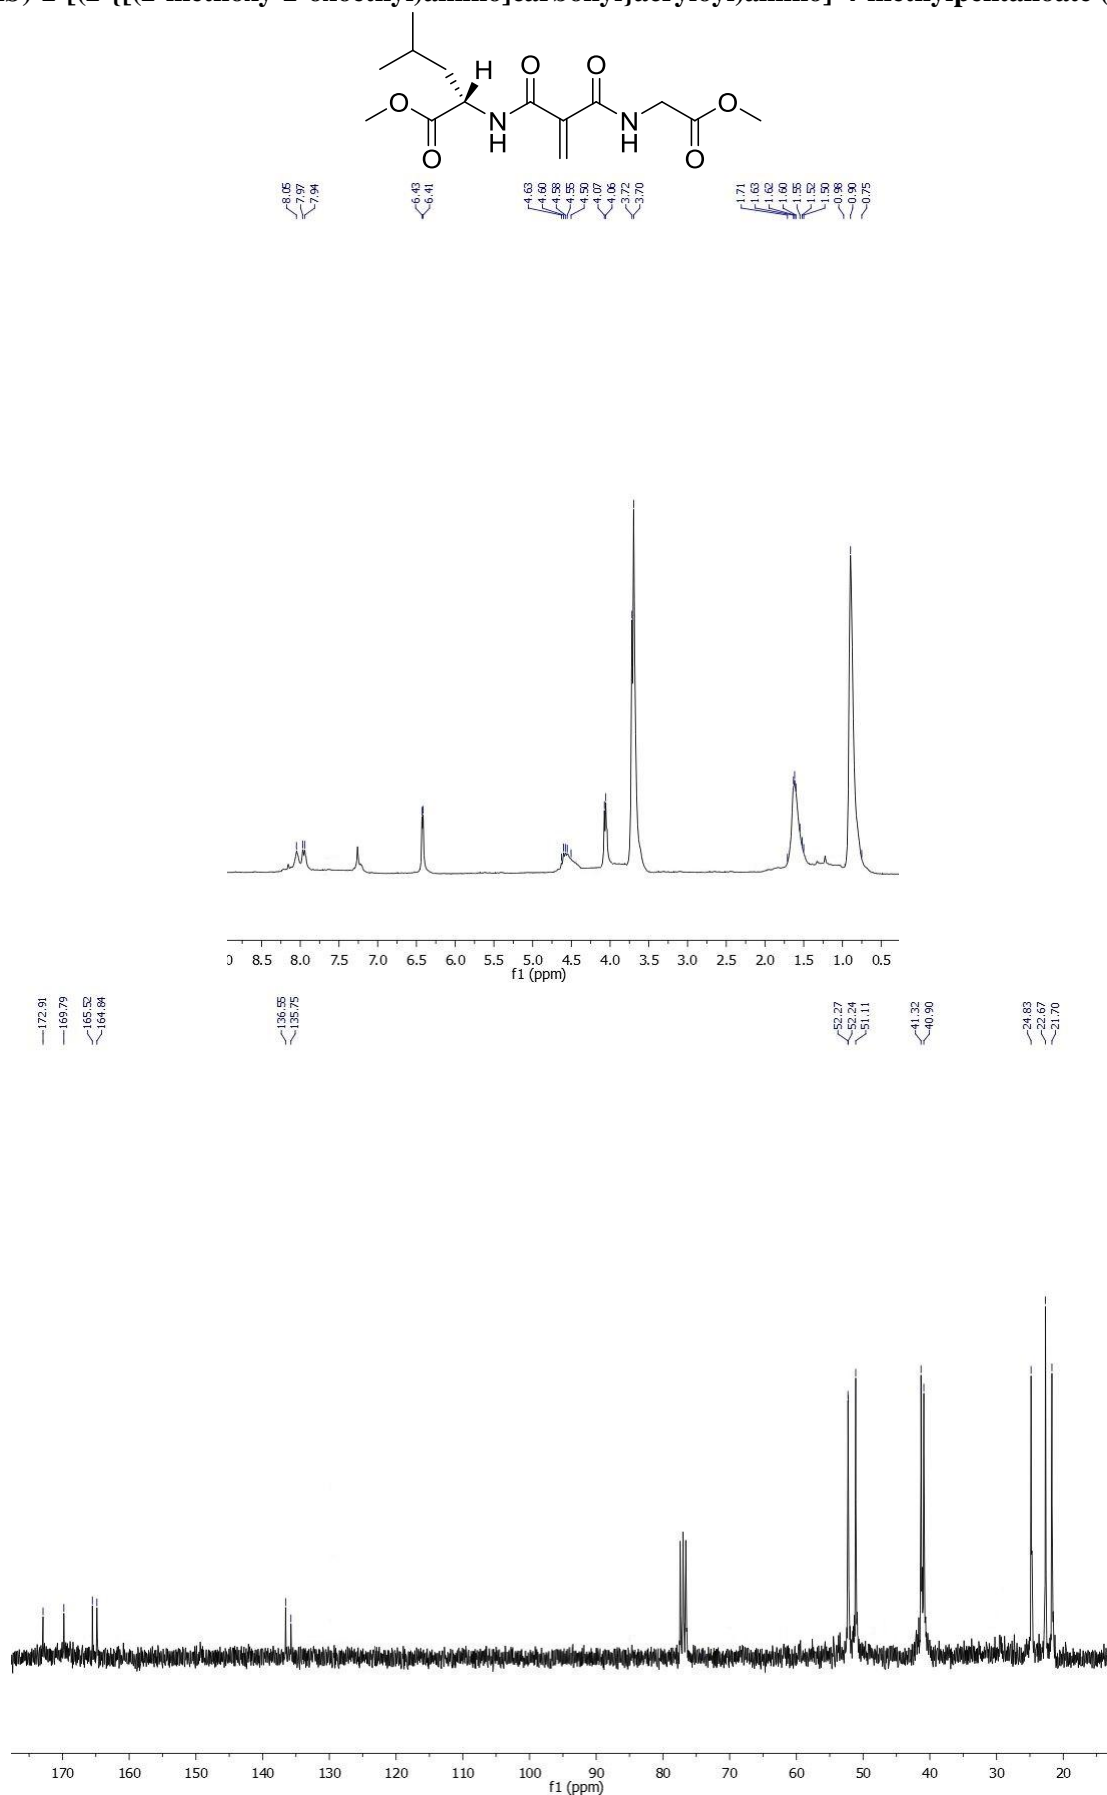

Supplementary Material (ESI) for RSC Advances

***tert*-Butyl (2*S*)-2-[2-(2-*tert*-butoxy-2-oxoethylcarbamoyl)acrylamido]-3-phenylpropanoate (3d)**

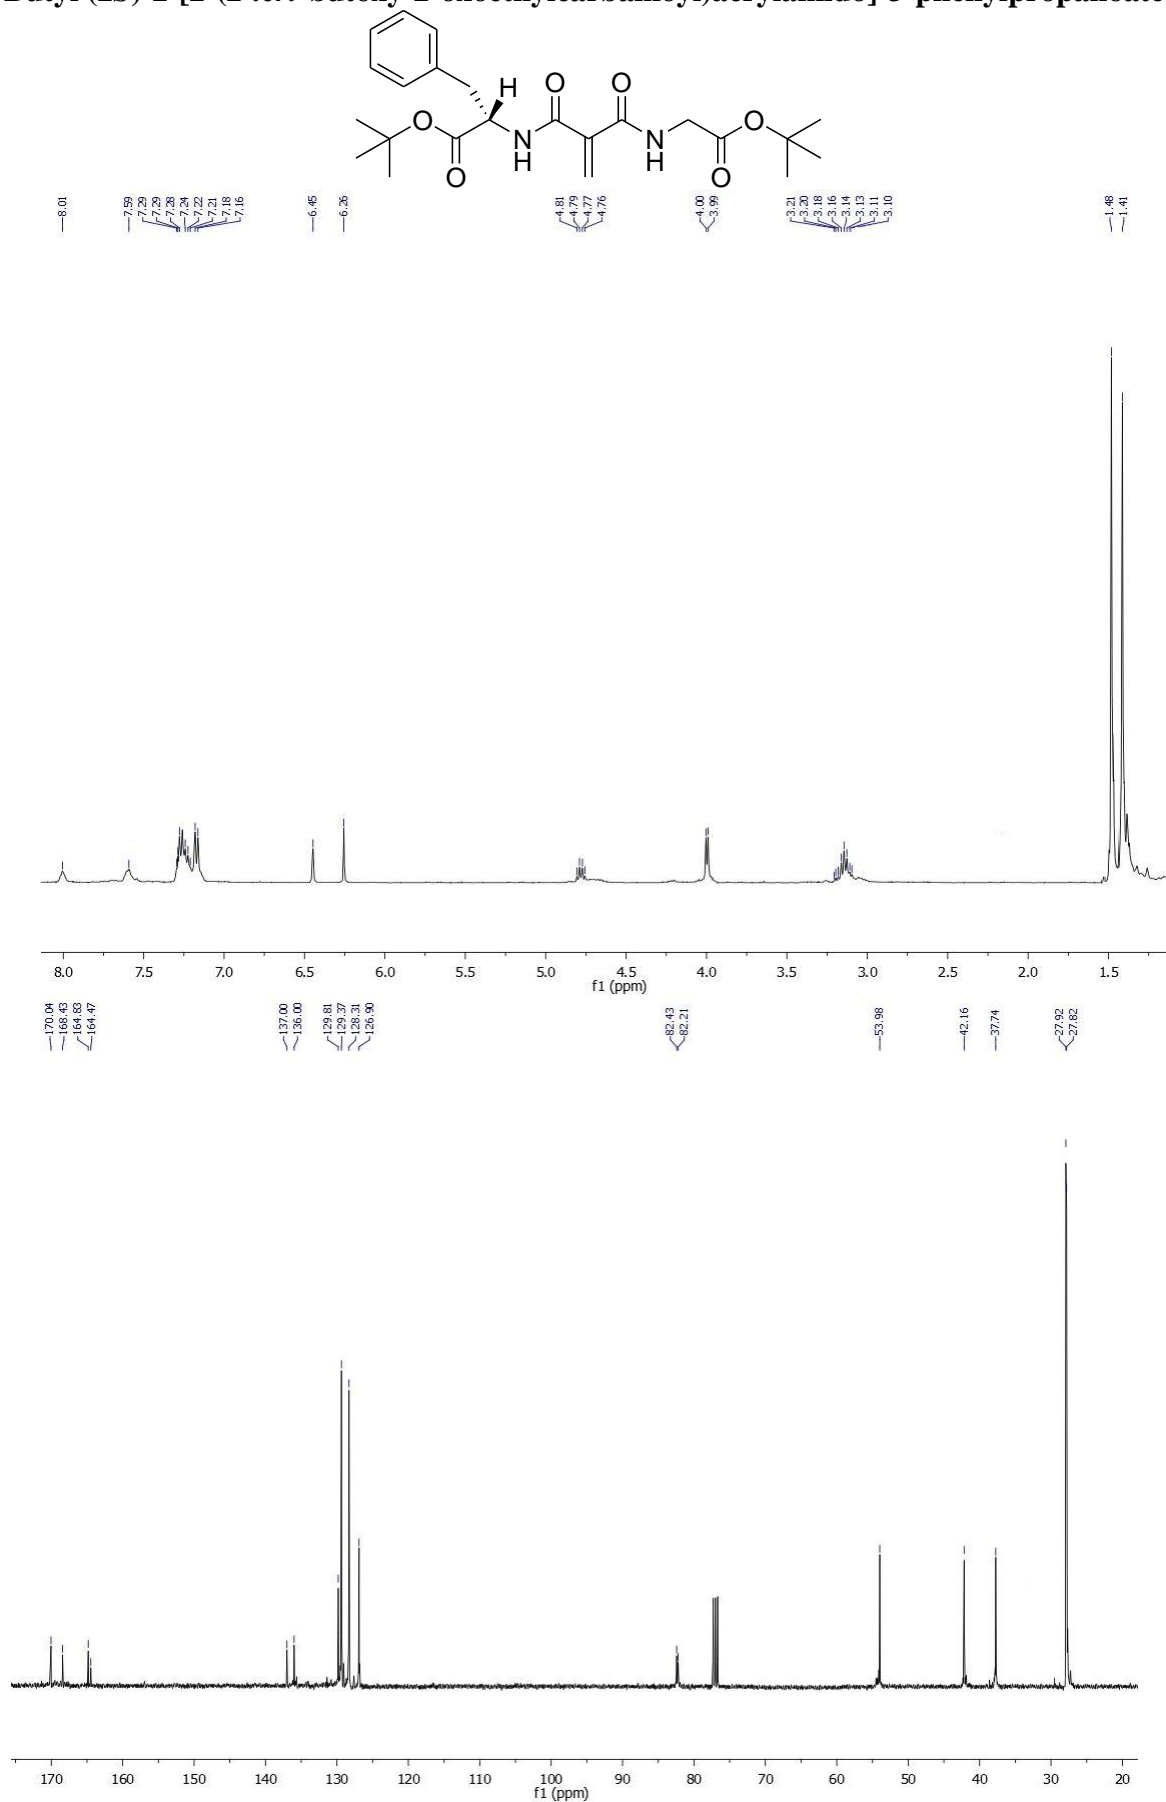

Supplementary Material (ESI) for RSC Advances

### Methyl (2*S*)-2-[2-(3-methoxy-3-oxopropylcarbamoyl)acrylamido]-3-phenylpropanoate (3e)

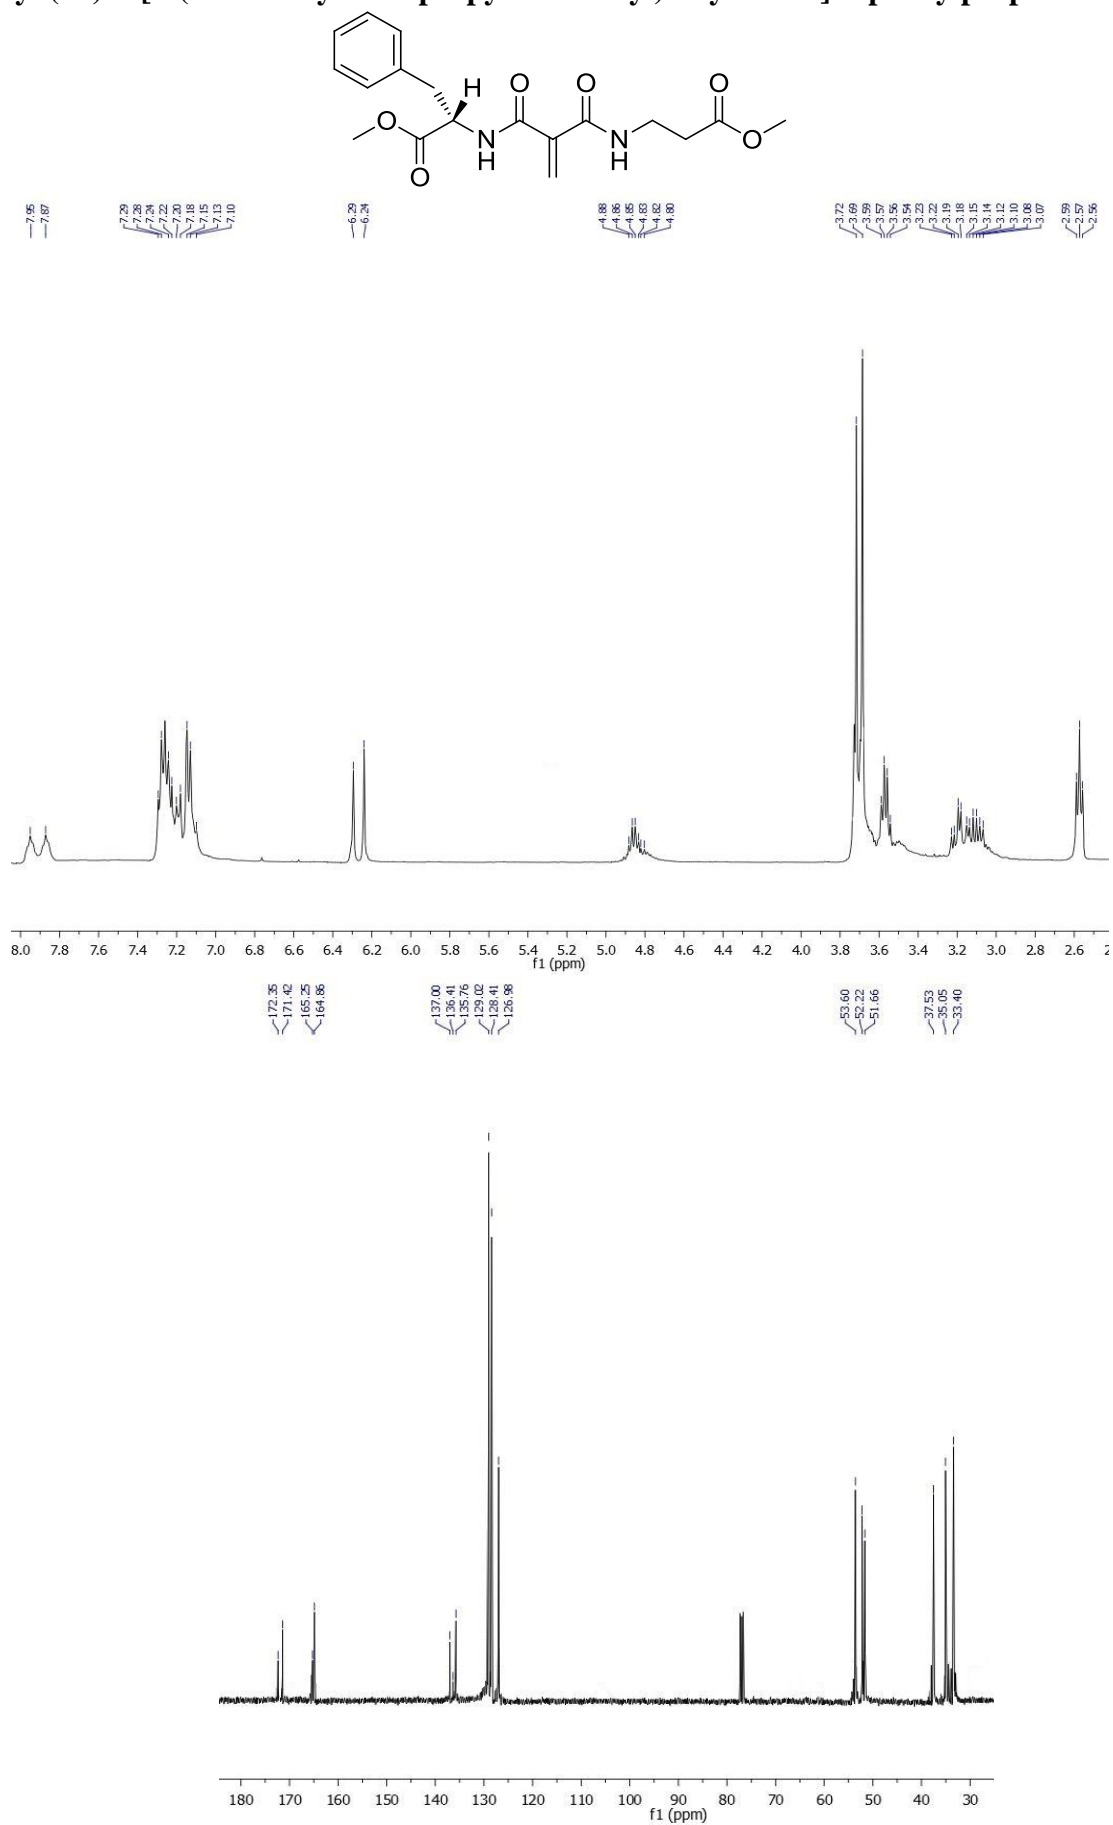

Supplementary Material (ESI) for RSC Advances

### Methyl (2*S*)-2-[2-(2-methoxy-2-oxoethylcarbamoyl)acrylamido]-3-phenylpropanoate (3f)

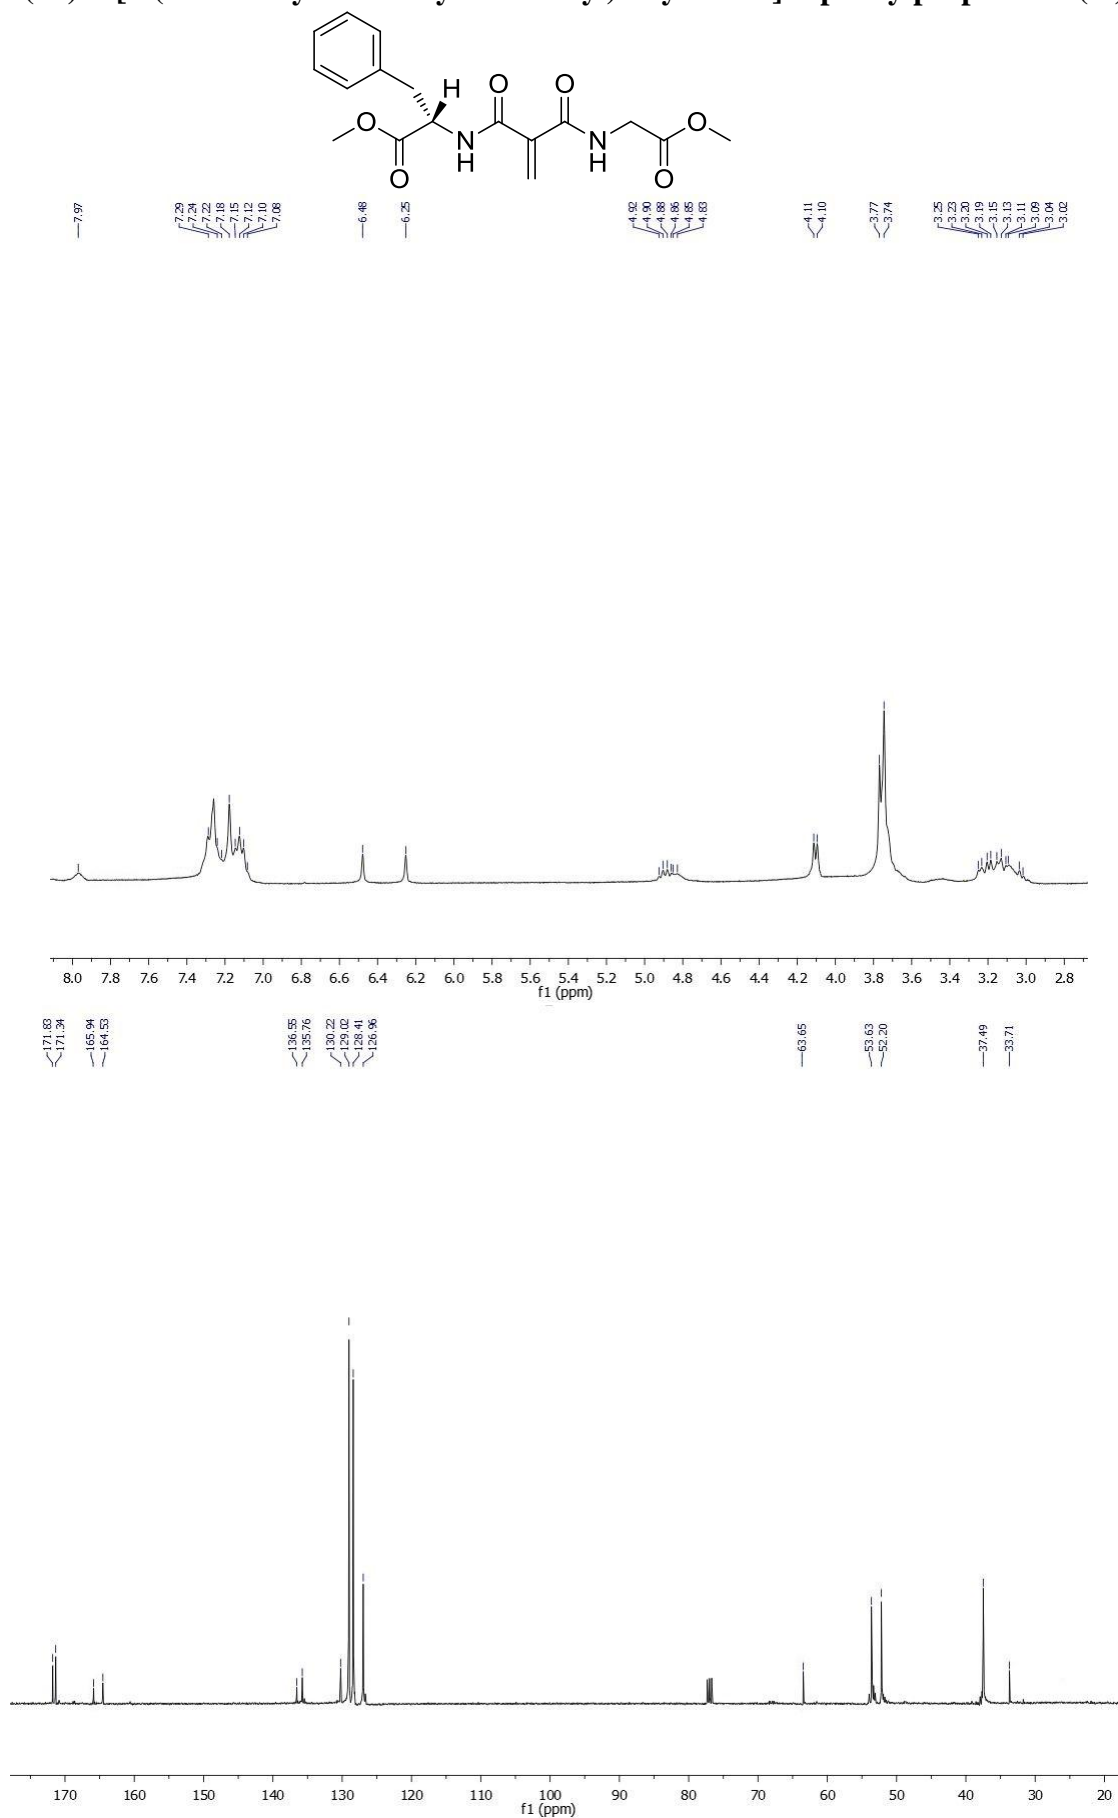

Supplementary Material (ESI) for RSC Advances

**Di-tert-butyl 2,2'--[2-(benzyl)malonyl]bis(azanediy)ldiacetate (5a)**

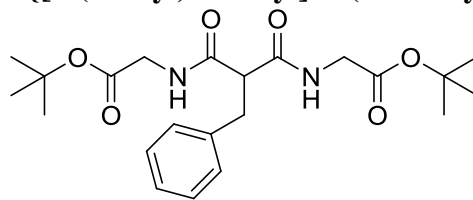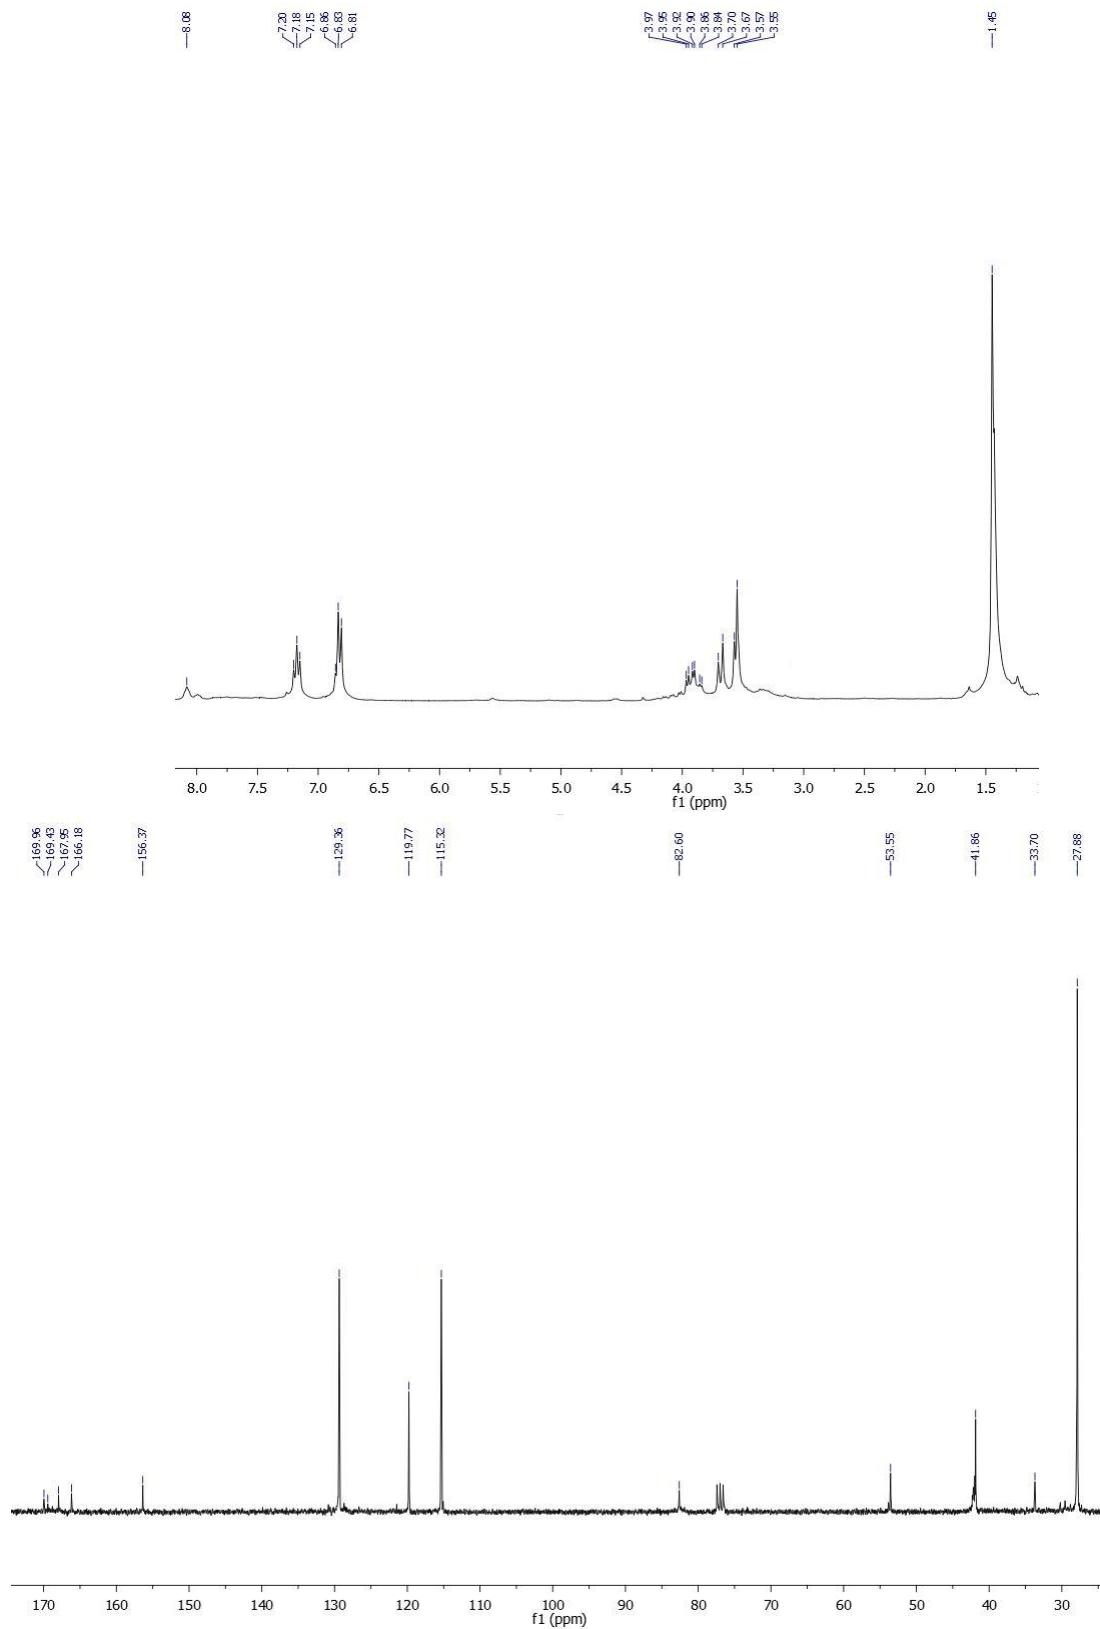

Supplementary Material (ESI) for RSC Advances

**Di-*tert*-butyl 2,2'-[2-(4-methylbenzyl)malonyl]bis(azanediy)diacetate (13a)**

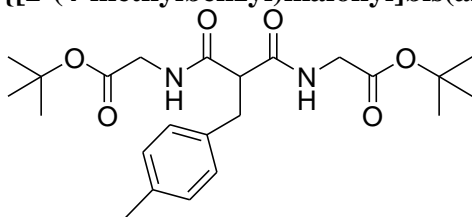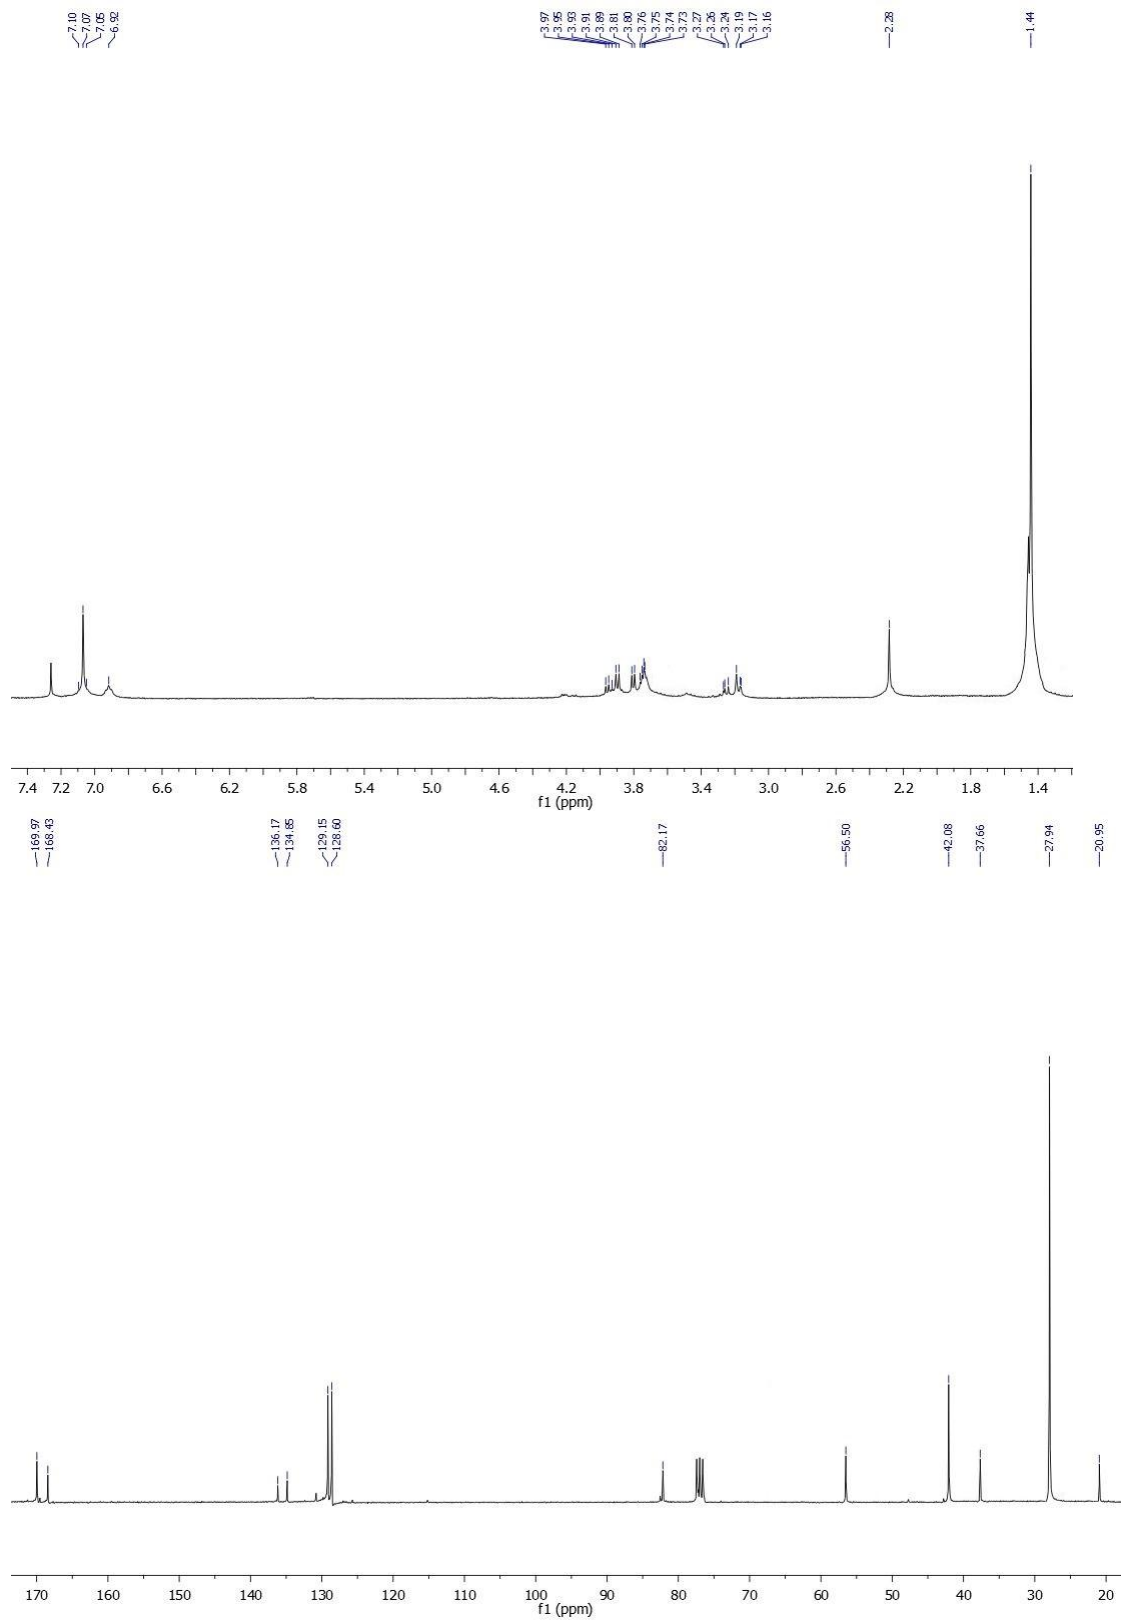

Supplementary Material (ESI) for RSC Advances

**Di-*tert*-butyl 2,2'-[2-(4-methoxybenzyl)malonyl]bis(azanediy)diacetate (14a)**

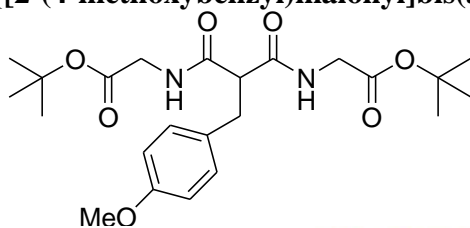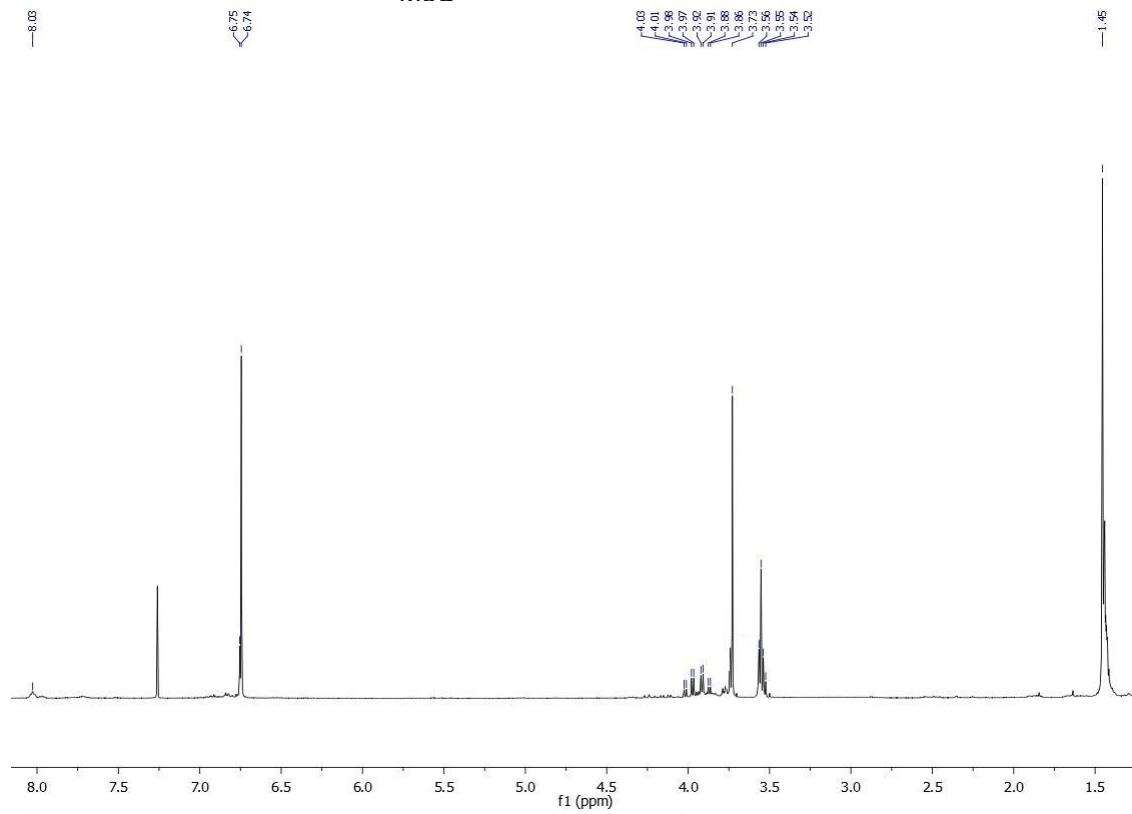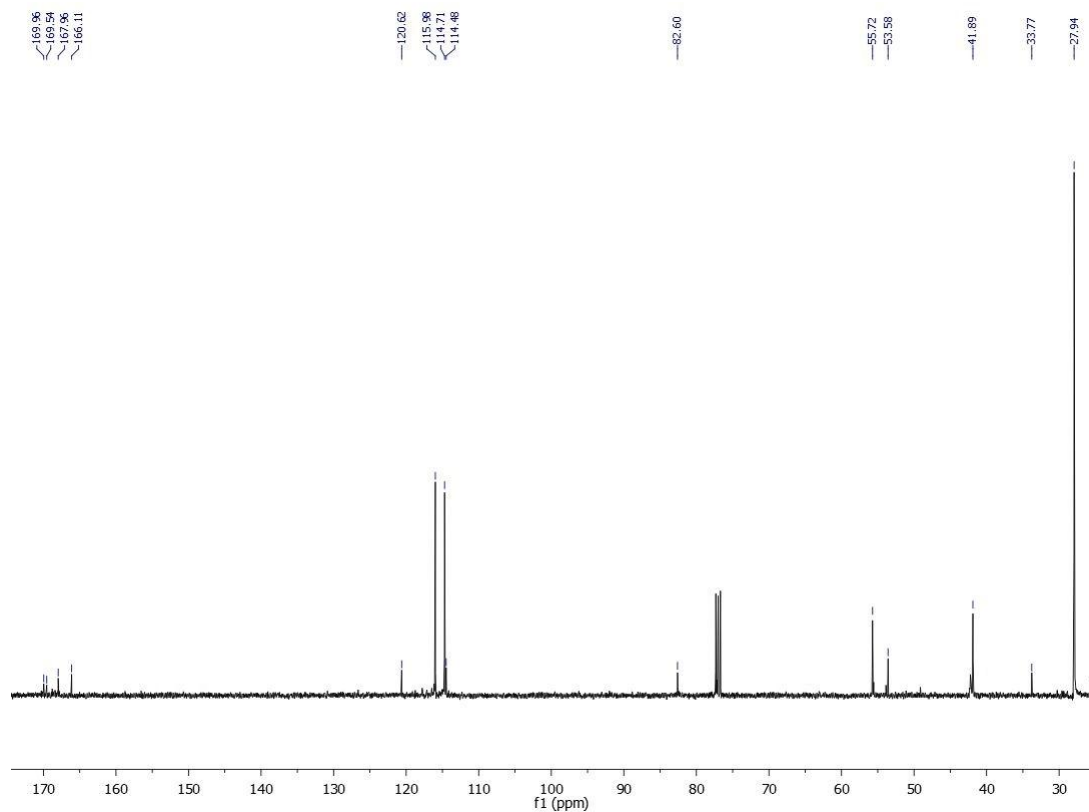



Supplementary Material (ESI) for RSC Advances

**Di-*tert*-butyl 2,2'-[2-(4-bromobenzyl)malonyl]bis(azanediy)ldiacetate (15a)**

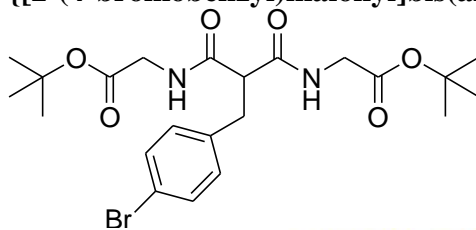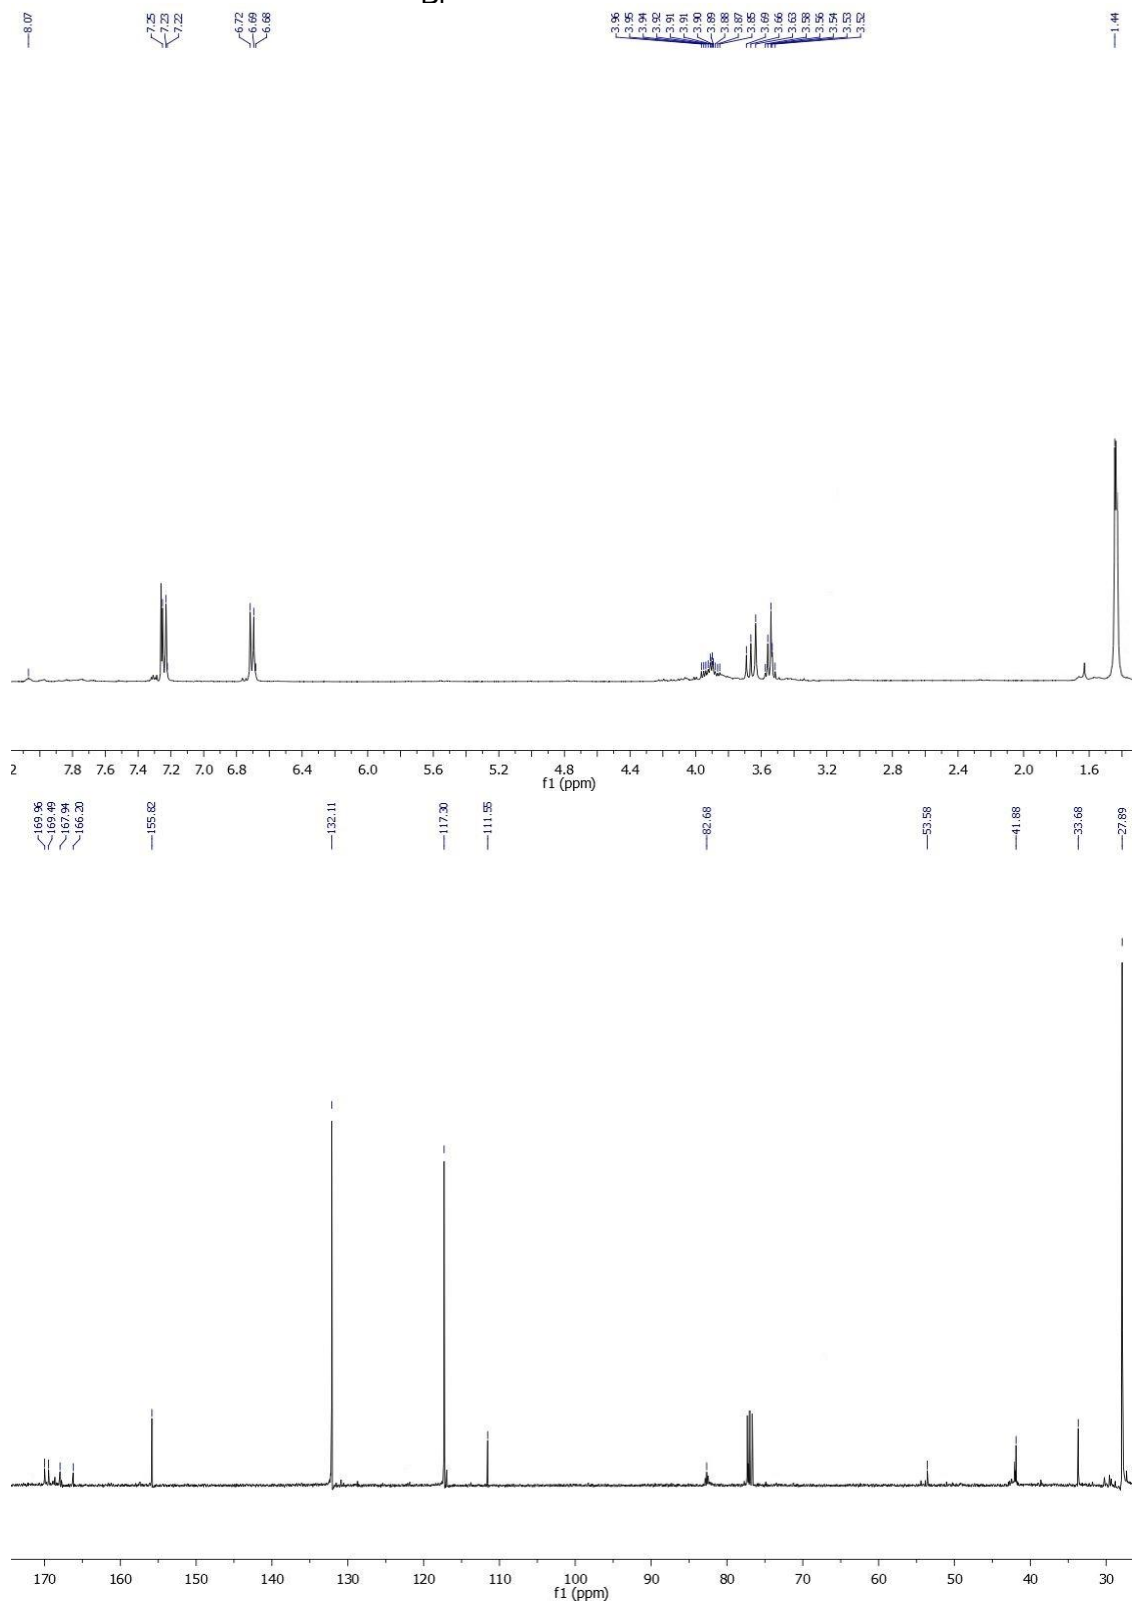

Supplementary Material (ESI) for RSC Advances

### Di-*tert*-butyl 2,2'-[2-(4-fluorobenzyl)malonyl]bis(azanediy)ldiacetate (16a)

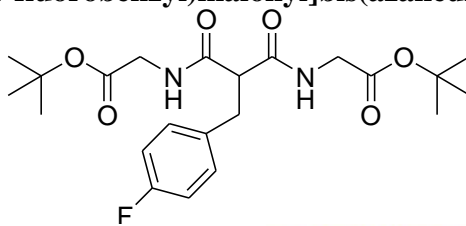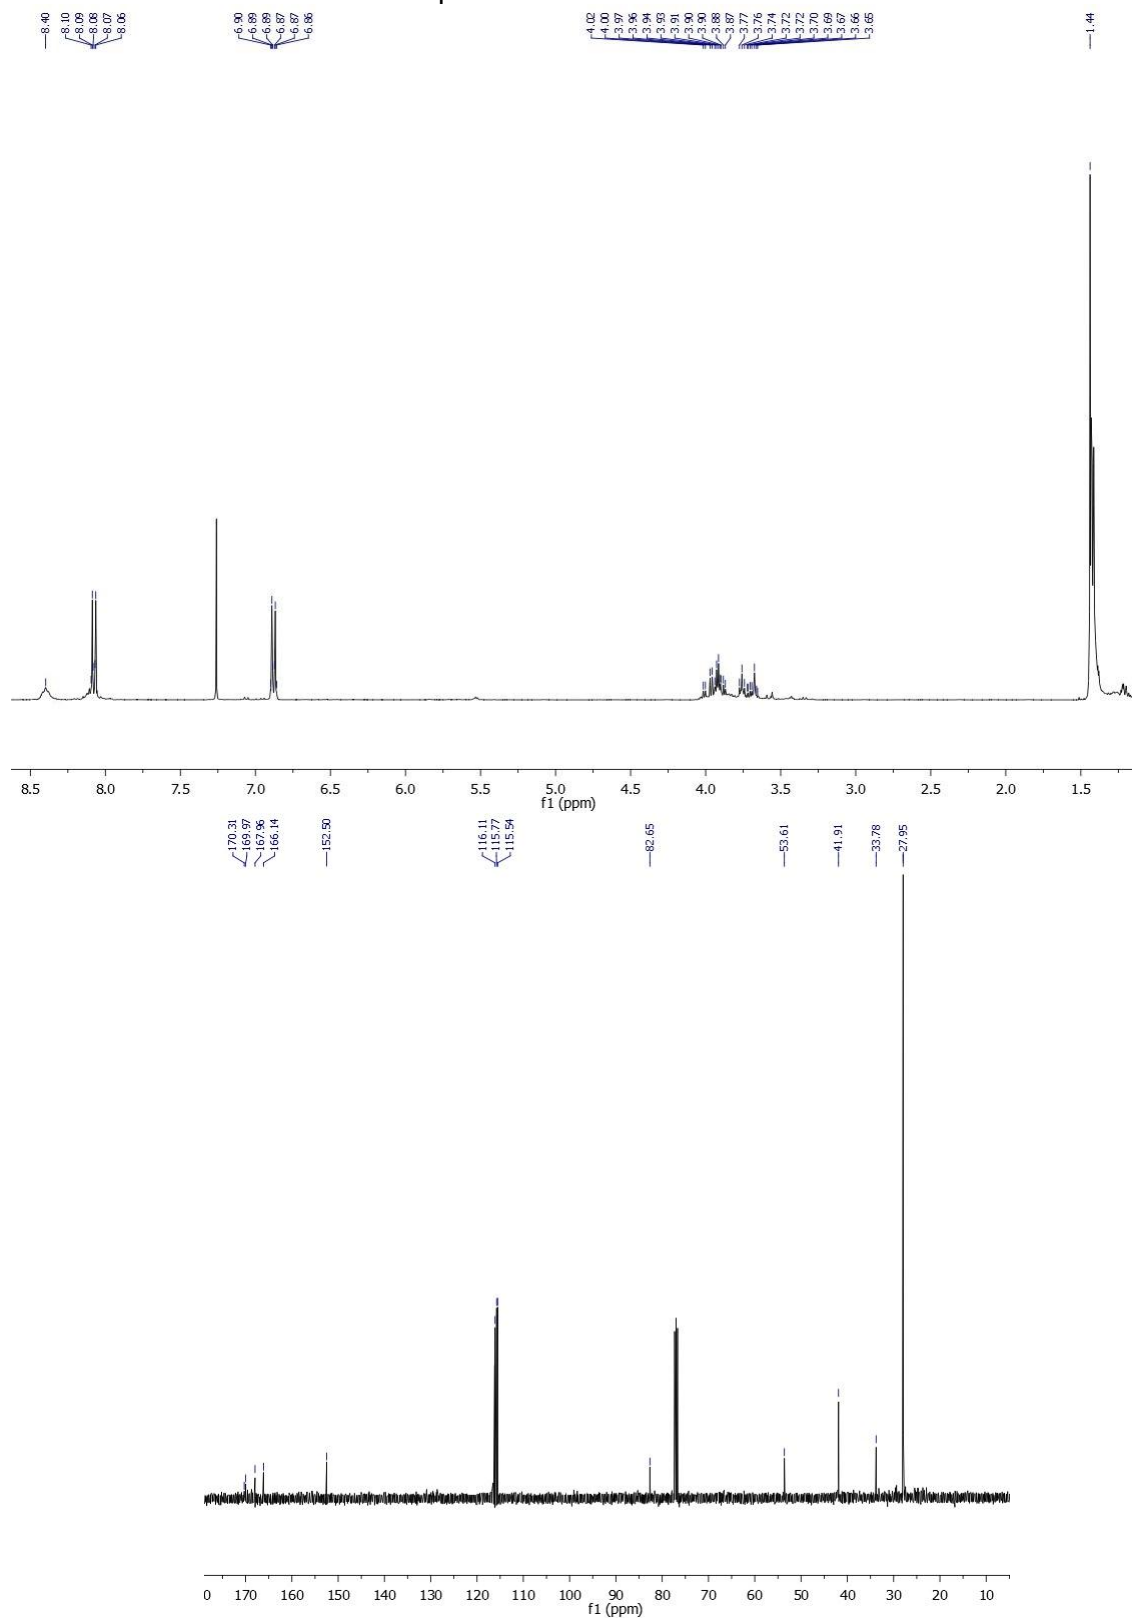

Supplementary Material (ESI) for RSC Advances

**Di-*tert*-butyl 2,2'-[2-(4-nitrobenzyl)malonyl]bis(azanediy)diacetate (17a)**

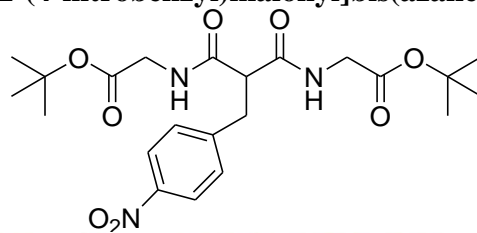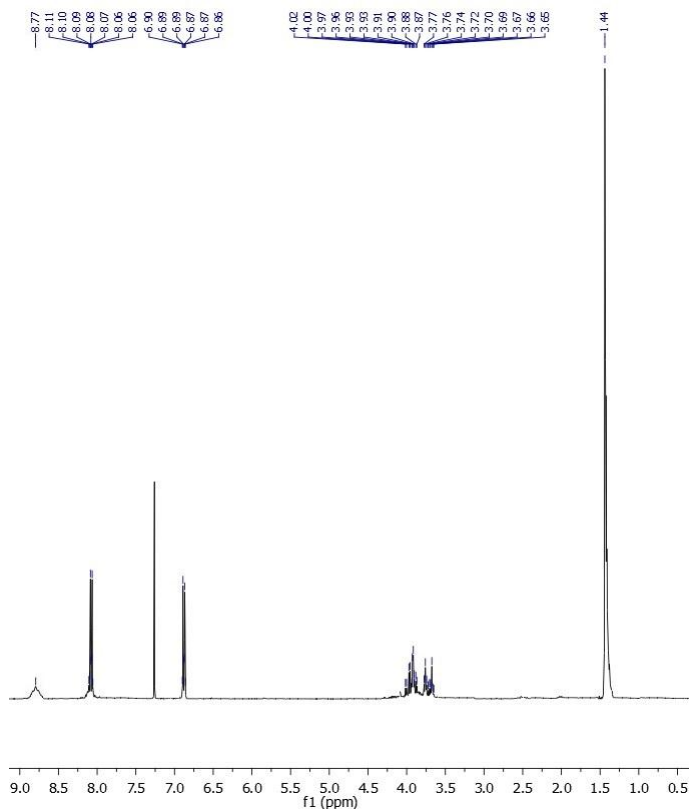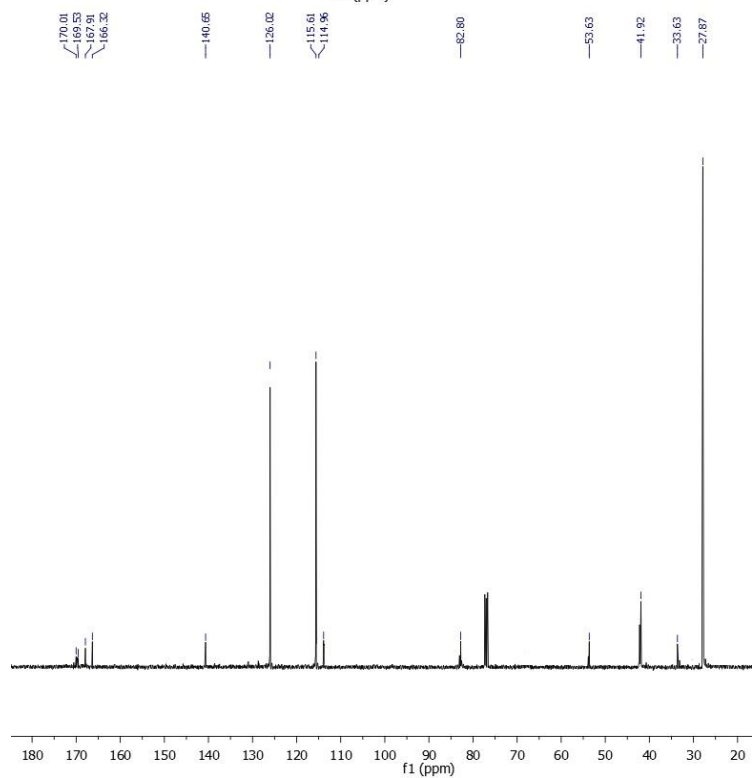

Supplementary Material (ESI) for RSC Advances

**Methyl 3-{3-[(2-*tert*-butoxy-2-oxoethyl)amino]-2-(4-methylbenzyl)-3-oxopropanamido}propanoate (13b)**

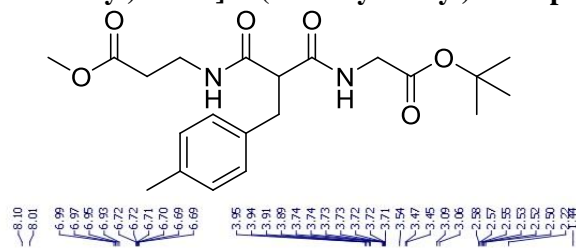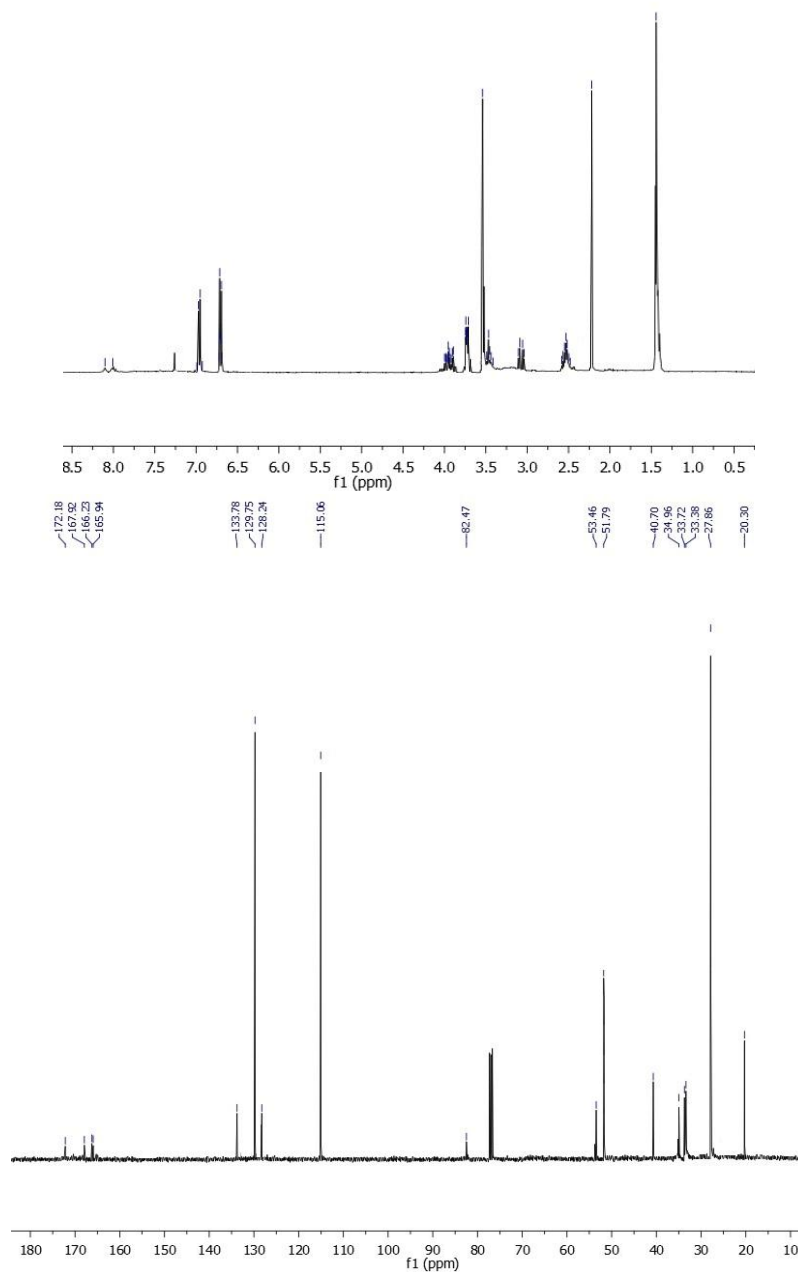

Supplementary Material (ESI) for RSC Advances

**Methyl (2*S*)-2-[3-(2-methoxy-2-oxoethylamino)-2-(4-methylbenzyl)-3-oxopropanamido]-4-methylpentanoate (13c, 13c')**

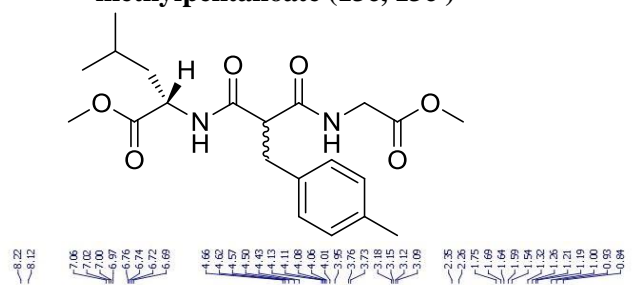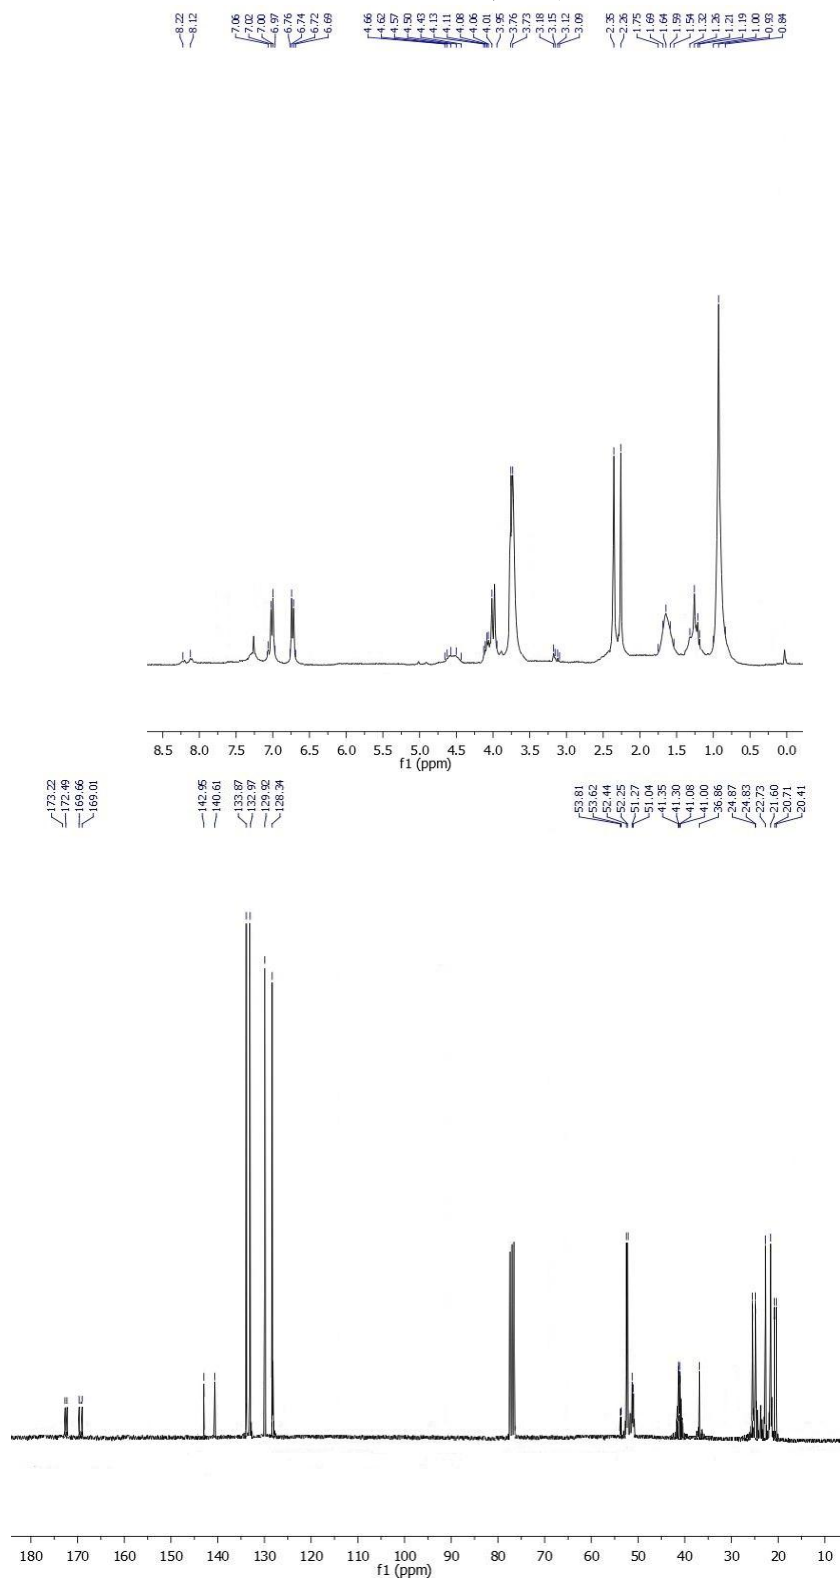

Supplementary Material (ESI) for RSC Advances

***tert*-Butyl (2*S*)-2-[3-(2-*tert*-butoxy-2-oxoethylamino)-2-(4-methylbenzyl)-3-oxopropanamido]-3-phenylpropanoate (13d, 13d')**

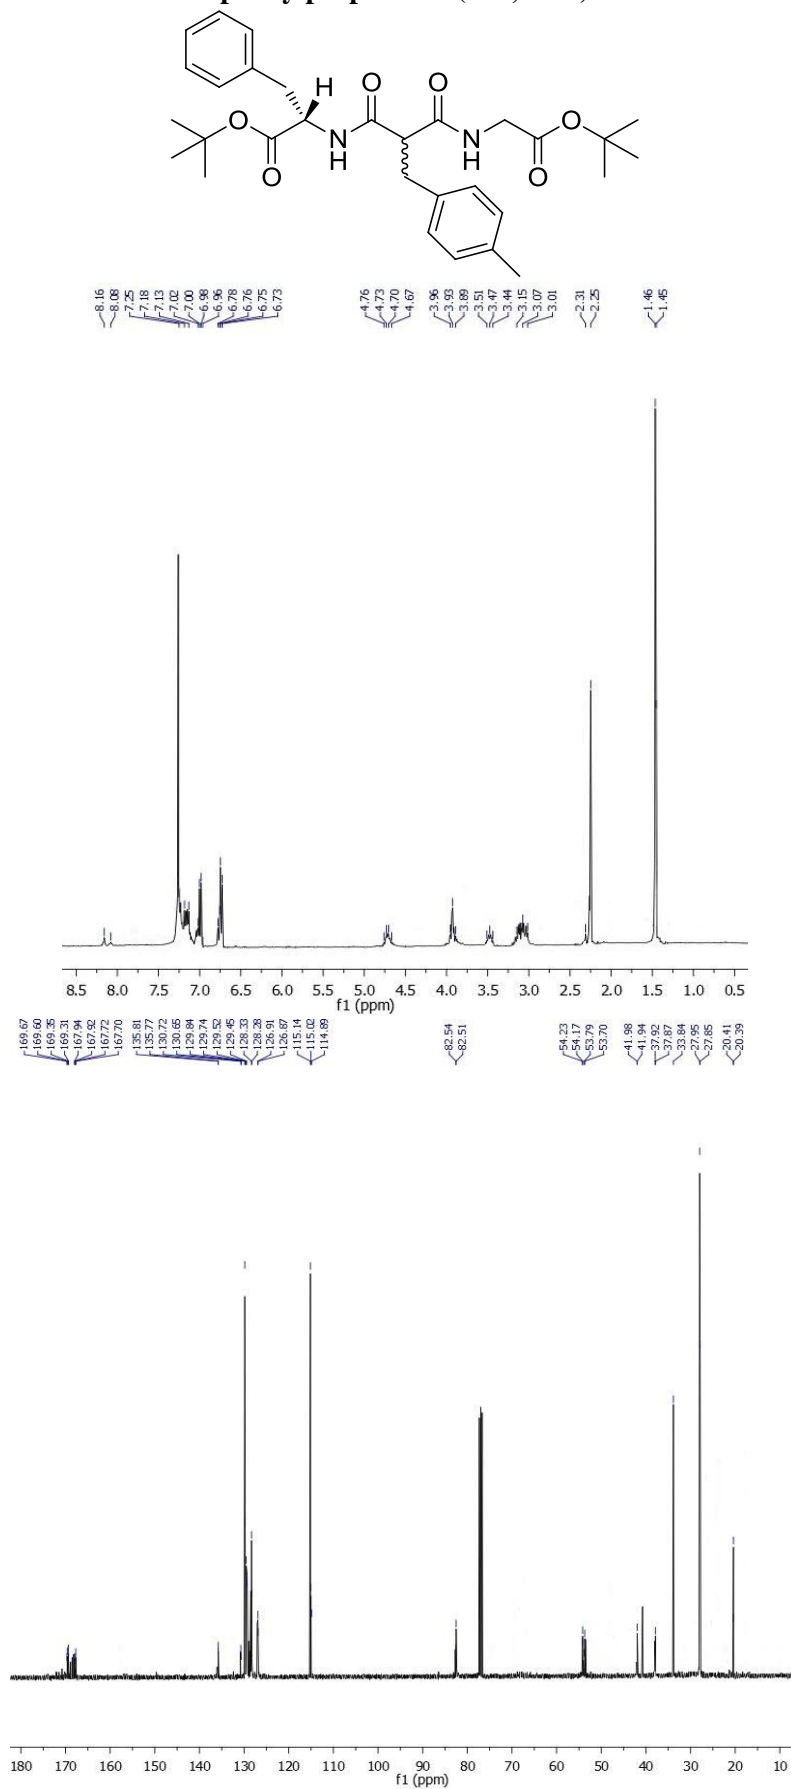

Supplementary Material (ESI) for RSC Advances

Methyl (2*S*)-2-{3-[(3-methoxy-3-oxopropyl)amino]-2-(4-methylbenzyl)-3-oxopropanamido}-3-phenylpropanoate (13e, 13e')

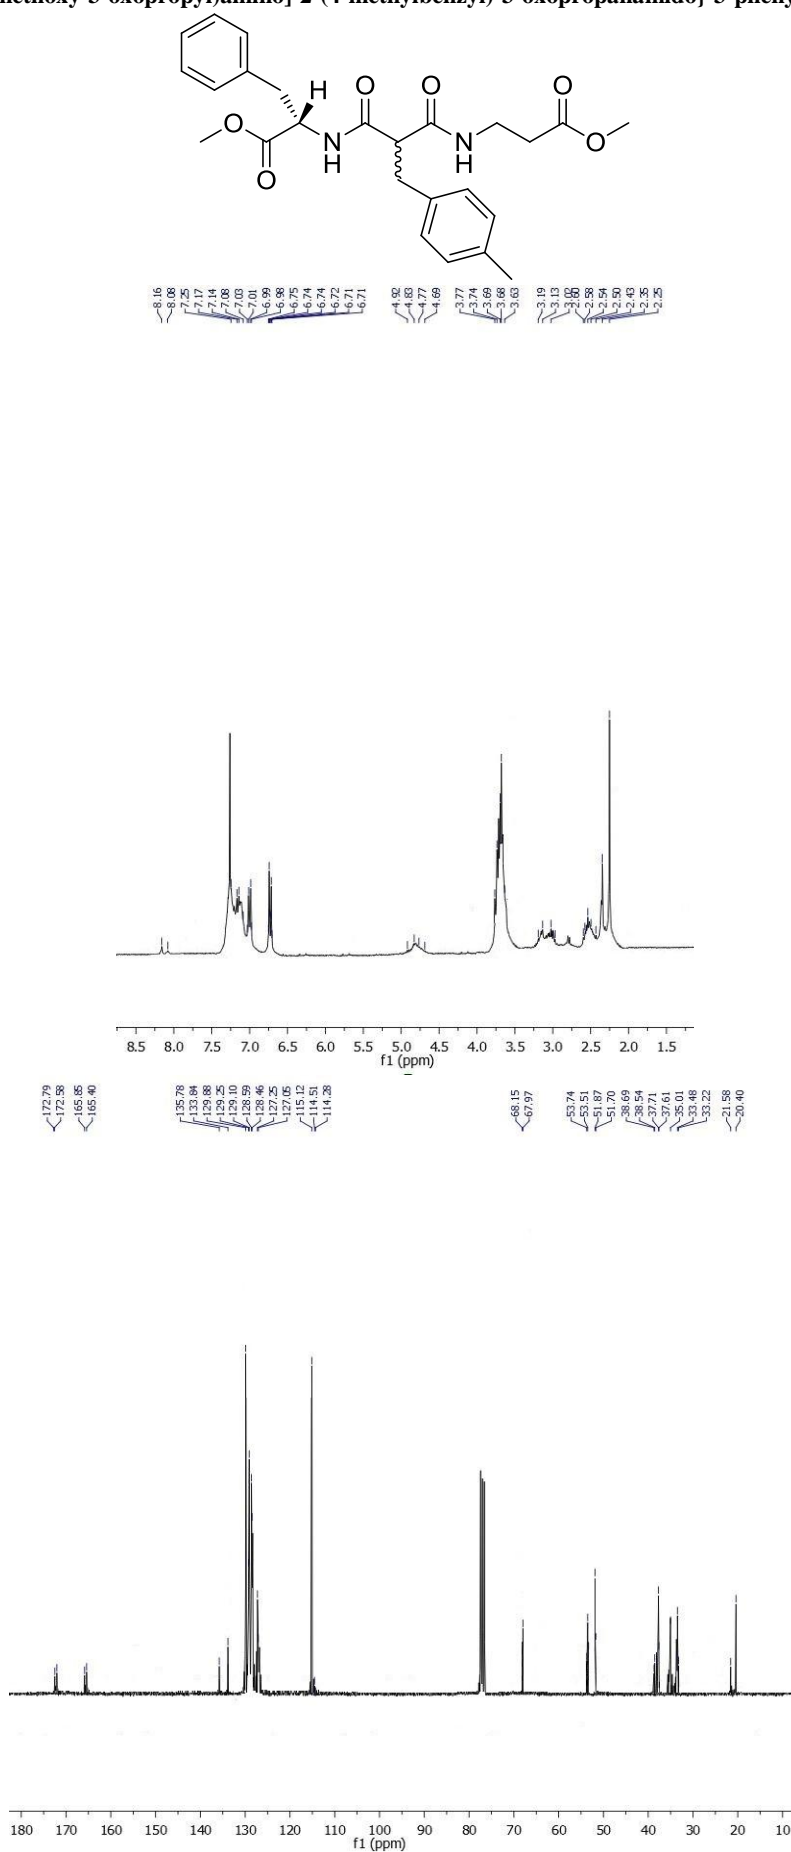

Supplementary Material (ESI) for RSC Advances

**Methyl (2*S*)-2-(3-(2-methoxy-2-oxoethylamino)-2-(4-methoxybenzyl)-3-oxopropanamido)-3-phenylpropanoate (13f, 13f')**

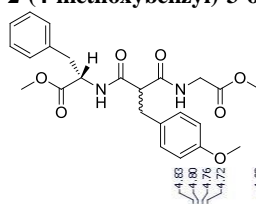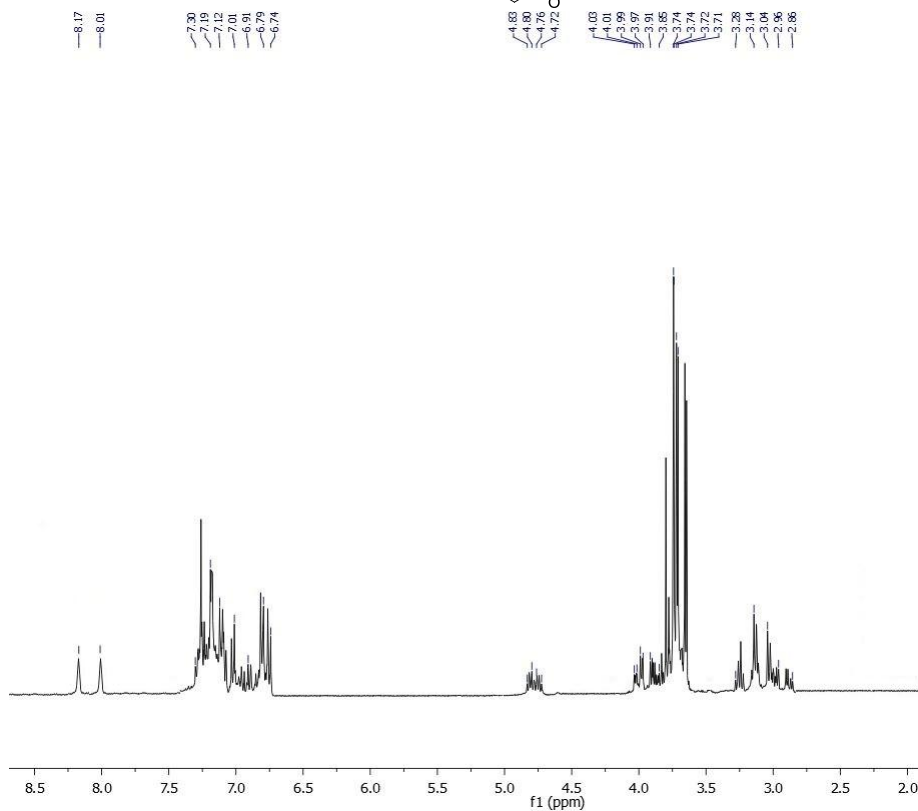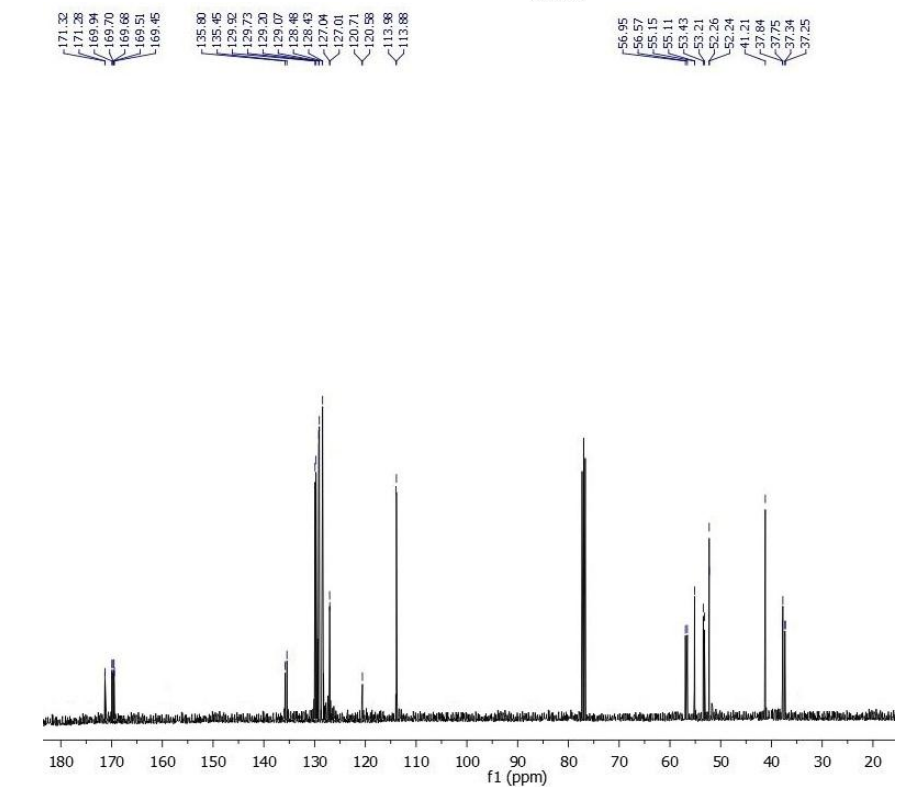

Supplement: c3ra41852a.pdf [file c3ra41852a.pdf]
